# 1    **Systematic Identification of Novel Cancer Genes through Analysis of Deep shRNA**

## 2    **Perturbation Screens**

3

4    Hesam Montazeri<sup>1,2†</sup>, Mairene Coto-Llerena<sup>2†</sup>, Gaia Bianco<sup>2†</sup>, Ehsan Zangene<sup>1</sup>, Stephanie  
5    Taha-Mehlitz<sup>3</sup>, Viola Paradiso<sup>2</sup>, Sumana Srivatsa<sup>4,5</sup>, Antoine de Weck<sup>6</sup>, Guglielmo Roma<sup>6</sup>,  
6    Manuela Lanzafame<sup>2</sup>, Martin Bolli<sup>7</sup>, Niko Beerenwinkel<sup>4,5</sup>, Markus von Flüe<sup>7</sup>, Luigi M.  
7    Terracciano<sup>2</sup>, Salvatore Piscuoglio<sup>2,3,7#</sup> and Charlotte K. Y. Ng<sup>2,8#</sup>

8

9    <sup>1</sup>Department of Bioinformatics, Institute of Biochemistry and Biophysics, University of  
10    Tehran, Tehran, Iran.

11    <sup>2</sup>Institute of Pathology, University Hospital Basel, Basel, Switzerland;

12    <sup>3</sup>Visceral surgery research laboratory, Clarunis, Department of Biomedicine, University of  
13    Basel, Basel, Switzerland;

14    <sup>4</sup>Department of Biosystems Science and Engineering, ETH Zurich, Basel, Switzerland;

15    <sup>5</sup>SIB Swiss Institute of Bioinformatics, Basel, Switzerland;

16    <sup>6</sup>Novartis Institutes for BioMedical Research, Novartis Pharma AG, Basel, Switzerland;

17    <sup>7</sup>Clarunis, Department of Visceral Surgery, University Centre for Gastrointestinal and Liver  
18    Diseases, St. Clara Hospital and University Hospital Basel, Switzerland

19    <sup>8</sup>Department for BioMedical Research, University of Bern, Bern, Switzerland.

20

21    †equal author contribution

22    #corresponding authors

23

24    Hesam Montazeri: [hesam.montazeri@ut.ac.ir](mailto:hesam.montazeri@ut.ac.ir)

25    Mairene Coto-Llerena: [mairene.cotollerena@usb.ch](mailto:mairene.cotollerena@usb.ch)

26    Gaia Bianco: [Gaia.Bianco@usb.ch](mailto:Gaia.Bianco@usb.ch)

27    Ehsan Zangene: [e.zangene@ut.ac.ir](mailto:e.zangene@ut.ac.ir)

28 Stephanie Taha-Mehlitz: [stephanie.taha@clarunis.ch](mailto:stephanie.taha@clarunis.ch)  
 29 Viola Paradiso: [viola.paradiso@usb.ch](mailto:viola.paradiso@usb.ch)  
 30 Sumana Srivatsa: [sumana.srivatsa@bsse.ethz.ch](mailto:sumana.srivatsa@bsse.ethz.ch)  
 31 Antoine de Weck: [antoine.deweck@novartis.com](mailto:antoine.deweck@novartis.com)  
 32 Guglielmo Roma: [guglielmo.roma@novartis.com](mailto:guglielmo.roma@novartis.com)  
 33 Manuela Lanzafame: [manuela.lanzafame@gmail.com](mailto:manuela.lanzafame@gmail.com)  
 34 Martin Bolli: [martin.bolli@claraspital.ch](mailto:martin.bolli@claraspital.ch)  
 35 Niko Beerenwinkel: [niko.beerenwinkel@bsse.ethz.ch](mailto:niko.beerenwinkel@bsse.ethz.ch)  
 36 Markus von Flüe: [markus.vonfluee@clarunis.ch](mailto:markus.vonfluee@clarunis.ch)  
 37 Luigi M. Terracciano: [Luigi.Terracciano@usb.ch](mailto:Luigi.Terracciano@usb.ch)  
 38 Salvatore Piscuoglio: [s.piscuoglio@unibas.ch](mailto:s.piscuoglio@unibas.ch)  
 39 Charlotte K. Y. Ng: [charlotte.ng@dbmr.unibe.ch](mailto:charlotte.ng@dbmr.unibe.ch)

40

## 41 **Abstract**

42 **Background:** Systematic perturbation screens provide comprehensive resources for the  
 43 elucidation of cancer driver genes, including rarely mutated genes that are missed by  
 44 approaches focused on frequently mutated genes and driver genes for which the basis for  
 45 oncogenicity is non-genetic. The perturbation of many genes in relatively few cell lines in  
 46 such functional screens necessitates the development of specialized computational tools  
 47 with sufficient statistical power.

48 **Results:** Here we developed APSiC (Analysis of Perturbation Screens for identifying novel  
 49 Cancer genes) that can identify genetic and non-genetic drivers even with a limited number  
 50 of samples. Applying APSiC to the large-scale deep shRNA screen Project DRIVE, APSiC  
 51 identified well-known, pan-cancer genetic drivers, novel putative genetic drivers known to be  
 52 dysregulated in specific cancer types and the context dependency of mRNA-splicing  
 53 between cancer types. Additionally, APSiC discovered a median of 28 and 35 putative non-

54 genetic oncogenes and tumor suppressor genes, respectively, for individual cancer types,  
55 including genes involved in genome stability maintenance and cell cycle. We functionally  
56 demonstrated that *LRRC4B*, a putative non-genetic tumor suppressor gene that has not  
57 previously been associated with carcinogenesis, suppresses proliferation by delaying cell  
58 cycle and modulates apoptosis in breast cancer.

59 **Conclusion:** We demonstrate APSiC is a robust statistical framework for discovery of novel  
60 cancer genes through analysis of large-scale perturbation screens. The analysis of DRIVE  
61 using APSiC is provided as a web portal and represents a valuable resource for the  
62 discovery of novel cancer genes.

63

64 **Keywords:** APSiC, perturbation screen, shRNA screen, cancer genes, *LRRC4B*, oncogene,  
65 tumor suppressor.

66

## 67 Background

68 Advances in large-scale functional screening technologies have enabled the discovery of  
69 gene requirements across diverse cancer entities [1,2]. Systematic perturbation screens  
70 using short hairpin RNA (shRNA) or CRISPR are increasingly used to investigate how  
71 genetic alterations or expression modulation of individual genes lead to phenotypic changes,  
72 revealing novel factors in carcinogenesis [3–5]. In parallel, large-scale sequencing efforts of  
73 10,000+ cancers have provided a comprehensive molecular portrait of human cancers and  
74 their molecular pathogenesis [6]. Among the major findings is the unbiased discovery of  
75 genes mutated at rates significantly higher than the expected background level [7], revealing  
76 the global landscape of genetic ‘driver genes’ [8]. The discovery of these ‘driver genes’ forms  
77 the critical foundations of cancer diagnostics, therapeutics, clinical trial design and selection  
78 of rational combination therapies. Despite the large cohort size, the functional consequences  
79 of mutations in rarely mutated genes, such as *YAP/TAZ* [9], are only revealed by functional

80 studies. Moreover, a systematic survey of non-genetic driver genes (i.e. driver genes for  
81 which the basis for oncogenicity is non-genetic) is lacking.

82 In a recent large-scale perturbation screen, the project DRIVE (deep RNAi interrogation of  
83 viability effects in cancer), 7,837 genes in 398 cancer cell lines were targeted with a median  
84 of 20 shRNAs per gene across a variety of malignancies to generate a comprehensive atlas  
85 of cancer dependencies [4]. The findings described in the study provided an overarching  
86 view of the nature and types of cancer dependencies, but has barely scratched the surface  
87 of the potential of the data generated. This huge resource of deep, robust and well-curated  
88 functional data, in conjunction of molecular profiling from the Cancer Cell Line Encyclopedia  
89 (CCLE) [10], remain largely untapped resources to be thoroughly mined and interrogated.

90 Analysis of shRNA perturbation screens is challenging due to the off-target effects of  
91 shRNAs as well as low number of cell lines screened [4,11]. Project DRIVE used deep  
92 coverage libraries to alleviate the off-target issues [4]. Additionally, several computational  
93 tools have been developed to elicit the on-target effect from a pool of siRNAs that have both  
94 on- and off-target effects [11–15]. RSA provides an absolute gene score based on the rank  
95 distribution of phenotypes produced by all shRNA reagents of a given gene [14]. ATARiS  
96 estimates a consensus shRNA profile for each gene and provides a relative gene score [13].  
97 DEMETER is a regularized linear model for computing the effects due to knockdown of a  
98 target gene by taking into account the effects due to the seed sequence [11], while  
99 DEMETER2 is a complex hierarchical model structure that provides absolute gene  
100 dependency score as opposed to ATARiS and DEMETER that provide relative dependency  
101 score [15].

102 Cancer dependencies can be divided into two main groups of non-self dependencies (or  
103 synthetic lethality) and self-dependencies. Synthetic lethality refers to the cell dependency  
104 on the concomitant loss of two or more genes. In the context of an shRNA or CRISPR  
105 screen, synthetic lethality refers to the loss of cell viability upon knockdown/knockout of a



gene conditional on the loss-of-function state of another gene. Various computational approaches have been used to discover synthetic lethal pairs from perturbation studies [16–18]. MiSL is a computational pipeline for the identification of synthetic lethal pairs using Boolean implications applied to the The Cancer Genome Atlas (TCGA) datasets [19,20]. A recent computational tool, called SLIdR, uses Irwin-Hall tests and causal inference for the discovery of pan-cancer as well as cancer-specific synthetic lethal pairs using the DRIVE data [21]. On the other hand, self-dependency refers to cell dependency on a gene with specific molecular features such as mutation, copy number, expression, and DNA methylation. Based on the molecular features, various statistical tests such as Fisher’s Exact and Wilcoxon tests, and differential expression analysis have been used to discover association between molecular features and gene dependencies. Most existing methods for finding self-dependencies are limited to the pan-cancer setting where a sufficient number of cell lines is available [4]. These tests lack statistical power for a limited number of observations (i.e. 5-10 observations) particularly after multiple testing corrections for a large number of tests. While the project DRIVE is one of the largest of its kind, the number of cell lines for some cancer types is quite small. A tool that can identify self-dependencies with small sample size is needed to make the best use of perturbation screens to reveal the cancer type-specific vulnerabilities.

Here, we introduce APSiC (Analysis of Perturbation Screens for identifying novel Cancer genes), a novel tool for the systematic and robust interrogation of large-scale perturbation screens to discover gene (self-)dependencies for individual cancers even with limited number of samples. Incorporating mutation and copy number status of the samples, APSiC identifies potential genetic and non-genetic cancer genes. We consider three classes of genetic drivers, namely mutation oncogenes, amplification oncogenes, and mutation tumor suppressor genes as well as two classes of non-genetic drivers namely non-genetic oncogenes and tumor suppressor genes. Of particular importance, non-genetic drivers identified by APSiC have been largely less studied in cancer research. We applied APSiC to

26 cancers and identified both known and novel candidate genetic and non-genetic drivers. As a proof of concept, we functionally validated *LRRC4B* as a putative tumor suppressor gene in breast cancer. We provided the statistical analysis of DRIVE by APSiC as a web portal (<https://apsic.shinyapps.io/APSiC/>) for the scientific community to explore and functionally characterize genes that may be involved in carcinogenic processes and may pave the way for the discovery of novel cancer-related biomarkers and drug targets.

## Results and Discussion

### The APSiC Algorithm

APSiC uses rank-based statistics to discover self-dependencies in perturbation screens (see Methods for a technical description of the algorithm). Given the raw cell viability readout of a perturbation screen, APSiC computes a rank profile for each gene by first ranking all genes by their viabilities upon knockdown in a given sample to the range of [0, 1] then aggregating the normalized ranks for a given gene across all samples (**Fig. 1a**). Thus ranks close to zero represent reduced viability while the ranks close to one indicate cell growth upon knockdown. Incorporating mutation and copy number status of the samples, APSiC identifies potential genetic and non-genetic cancer genes by assessing deviation of the distribution of normalized ranks from what is expected by chance using the Bates and Irwin-Hall tests. The Irwin-Hall distribution has been successfully used in the identification of synthetic lethal gene pairs [21] and prioritization of cancer genes based on multi-omics data [22]. The use of the rank-based statistics with the Bates and Irwin-Hall distributions provides enhanced statistical power when the number of cell lines is limited.

We consider three classes of genetic drivers (mutation oncogenes, amplification oncogenes, and mutation tumor suppressor genes) and two classes of non-genetic drivers (non-genetic oncogenes and tumor suppressor genes). We define mutation and amplification oncogenes as genes for which reduced cell viabilities are preferentially observed in samples with

missense mutations and copy number amplifications, respectively, while mutation tumor suppressor genes are those for which increased viabilities are preferentially observed in samples with deleterious mutations. To identify such genetic drivers, we test, for a given gene, whether ranks of the samples with and without the specific class of genetic alteration are significantly different using a one-sided Bates test (**Fig. 1b, Additional files 1-3**). For mutation and amplification oncogenes, we compute the lower-tailed  $P$  values (i.e. the ranks preferentially suggest reduced viability upon gene knockdown), while for mutation tumor suppressor genes, we compute the upper-tailed  $P$  values (i.e. the ranks preferentially suggest increased cell viability upon knockdown). For the non-genetic drivers, we test whether gene knockdown in samples without genetic alteration in the gene has any impact on cell viability by computing lower and upper-tailed Irwin-Hall test  $P$  values for oncogenes and tumor suppressor genes, respectively (**Fig. 1c, Additional files 4-5**). Optionally, we further test whether the expression of candidate non-genetic oncogenes or tumor suppressor genes is respectively enhanced or repressed in human tumors compared to the corresponding normal tissue type.

## APSiC identifies well-known and novel genetic cancer drivers

We applied APSiC to the DRIVE perturbation screens and the genetic data from the CCLE [10] to identify genetic driver genes (**Additional files 1-3**). The dataset consists of 383 cell lines across 26 cancer types, with a median of 11 (range 5-40) cell lines per cancer type (**Fig. 2a**). In a pan-cancer analysis, APSiC reassuringly identified the well-known mutation oncogenes *BRAF*, *CTNNB1*, *KRAS*, *NRAS*, *PIK3CA* and *TP53* (**Figs. 2b-c, Additional file 6**). Additionally, *DDX27*, *DCAF8L2* and *RBM39* were detected as mutation oncogenes (**Additional files 6 and 7**). The top amplification oncogene were *KRAS*, *BRAF*, *CDK4*, *YAP1*, *IL6* and *HAS2* (**Figs. 2b, d and Additional file 6**), while the only mutation tumor suppressor was *ARID1A* (**Figs. 2b, e and Additional file 6**). However, the identification of mutation tumor suppressor genes in a knockdown screen is likely to have limited utility given

that mutation tumor suppressor genes are frequently associated with loss of the wild-type allele.

One of the main strengths of APSiC is the identification of dependencies in small sample sets. We therefore applied APSiC to the DRIVE data to identify genetic driver genes for individual cancer types. Across the 26 cancer types, we found 20, 18 and 14 mutation oncogenes, amplification oncogenes and mutation tumor suppressor genes, respectively (**Fig. 2f** and **Additional files 1-3**), in 15, 14 and 11 cancer types. We found no correlation between the number of cell lines and the number of driver genes identified ( $p=0.14$ ,  $0.21$  and  $0.97$  for mutation oncogenes, amplification oncogenes and mutation tumor suppressor genes, respectively, Spearman correlation tests). *KRAS*, *BRAF* and *TP53* were identified as a mutation oncogene in 4, 2 and 2 cancer types, respectively, while the other 17 genes were identified as mutation oncogenes in a single cancer type each. Other well described mutation oncogenes include *NFE2L2* in esophagus carcinoma and *CTNNB1* in non-small cell lung cancer. The remaining putative mutation oncogenes have not been reported as frequently mutated in human cancers. These putative novel mutation oncogenes include *RREB1* (Ras Responsive Element Binding Protein 1) and *SBK1* (SH3 Domain Binding Kinase 1), both of which have previously been found to be dysregulated in cancer [23,24].

No amplification oncogene or mutation tumor suppressor was identified in more than one cancer type. We identified *MCL1* and *RHOB* as the top amplification oncogenes in the squamous subtype of non-small cell lung cancer and glioma, respectively (**Fig. 2f** and **Additional files 2-3**). *HOXA5*, a gene frequently overexpressed in hepatocellular carcinoma [25], was identified as an amplification oncogene. Of the mutation tumor suppressor genes, *BRCA1* and *SETD2* were found in breast and kidney cancers, respectively. *BAZ2B*, a gene involved in chromatin remodeling, is a putative mutation tumor suppressor in esophageal cancer. Of note, 15% of *BAZ2B* somatic mutations in the TCGA pan-cancer cohort are truncating mutations [8], suggestive of a tumor suppressor role for *BAZ2B*. Taken together,

APSiC identified both well known and putative genetic driver genes previously linked to carcinogenesis.

### **Survey of non-genetic driver genes reveals cancer type specificity**

By identifying strong irregular viability patterns in the rank profiles of cell lines wild-type for a given gene using APSiC, we evaluated the non-genetic dependencies across cancer types in the DRIVE data (**Additional files 4-5**). Consensus clustering of the most variable genes in terms of APSiC *P* values revealed that such non-genetic dependencies segregate by organ systems or cell-of-origin into four clusters (**Fig. 3a**). In particular, non-epithelial cancers including leukemias/lymphomas, sarcomas, gliomas and neuroblastomas form a cluster distinct from epithelial cancers including those of the lungs, the breasts and gastrointestinal tract. This is consistent with the observation that multi-omics cancer classification is primarily driven by cell-of-origin and anatomic regions [26]. Furthermore, the top-level segregation of the cancer types was largely driven by the context-dependency of mRNA-splicing genes. We observed that mRNA-splicing genes such as *PRPF6* (Pre-mRNA Processing Factor 6) and *SART3* (Spliceosome Associated Factor 3, U4/U6 Recycling Protein) were tumor suppressive in the cluster enriched for non-epithelial cancers while they were oncogenic in the epithelial cancer cluster (**Fig. 3b**). The context-dependency highlights the divergent role of mRNA-splicing in carcinogenesis between cancer types. Our results also underscore the necessity for an algorithm powerful enough to analyze perturbation screens for small numbers of samples in a cancer type-specific manner.

Based on the DRIVE screen alone, we identified a median of 28 non-genetic oncogenes (range 6-557) and 35 non-genetic tumor suppressor genes (range 1-471) per cancer type. However, we reasoned that the many non-genetic onco- and tumor suppressor genes would also be over- and under-expressed, respectively, in the corresponding cancer types. For the 12 cancer types for which gene expression data for the cancer and corresponding non-cancer counterparts were available from the TCGA (**Additional file 8**), we further restricted

the putative non-genetic onco- and tumor suppressor genes to those that were over- and under-expressed, respectively, relative to their non-cancer counterparts. After this filtering step, there were a median of 13 non-genetic oncogenes (range 2-117) and 3 non-genetic tumor suppressor genes (range 0-42, **Fig. 4**) per cancer type. We identified several well-known oncogenes, including *CDK1* (a master regulator of cell cycle) and *SMC1A* (a component of the cohesin complex involved in cell cycle checkpoint and genome stability)[27], and some that have been shown to have oncogenic properties in some cancer types, such as *MKI67IP* (or *NFIK*) [28]. We also identified *TEAD3*, a lesser described member of the TEAD family involved in hippo signalling, as oncogenic in liver cancer [29]. Among the top candidate tumor suppressors were *FOXP2* in endometrial cancer and *XRCC5* in kidney carcinoma. *FOXP2* knockdown has been shown to promote tumor initiation and metastasis in breast cancer [30] while *XRCC5*, encoding the protein Ku80, is a key DNA damage repair protein. However, we also identified many genes that have not been associated with carcinogenesis.

# ***LRRC4B* is a putative tumor suppressor gene in breast cancer**

As a proof-of-concept to validate APSiC, we selected *LRRC4B*, the top putative non-genetic tumor suppressor gene in breast cancer, for functional validation. A literature search of *LRRC4B* in cancer suggests that its role and function in carcinogenesis are unknown. Meanwhile, one of its paralogs *LRRC4* has been shown to have a putative tumor suppressor role in glioma by modulating the extracellular signal-regulated kinase/protein kinase B/nuclear factor- $\kappa$ B pathway [31]. In the DRIVE RNAi screen, nearly all breast cancer cell lines displayed significantly increased cell viability upon *LRRC4B* knockdown and breast cancers in TCGA showed lower *LRRC4B* expression compared to normal breast tissue (**Additional file 9a**). We selected the breast cancer cell lines MDA-MB231, BT-549 and MCF-7 with high, moderate and low endogenous *LRRC4B* expression to investigate whether *LRRC4B* knock-down would result in other classical cancer phenotypes such as increased migration and colony formation (**Additional file 9b**). We silenced *LRRC4B* in MDA-MB231

and BT-549 using siRNA, reducing *LRRC4B* protein expression by 40% and 60%, respectively, 72 hours post-transfection (**Figs. 5a, e**). In both models, *LRRC4B* downregulation significantly increased the proliferation and migration rates (**Figs. 5b-c, f-g**). By contrast, *LRRC4B* overexpression significantly reduced proliferation and migration in MCF-7 (**Figs. 5i-k**).

*LRRC4* has been shown to suppress cell proliferation by delaying cell cycle in late G<sub>1</sub> phase [32],[33]. To test whether *LRRC4B* may play the same role in breast, we analyzed cells with *LRRC4B* overexpression or downregulation stained with DAPI by flow cytometry (FACS). *LRRC4B* knockdown in MDA-MB231 and BT-549 promoted cell transition into S phase (**Figs. 5d, h**), while *LRRC4B* overexpression in MCF-7 significantly retained cells in G<sub>1</sub> phase (**Fig. 5l**), suggesting a similar mechanism to *LRRC4*.

A common mechanism of oncogenicity is resistance to apoptosis [34]. To test whether modulation of apoptosis is a mechanism of action of *LRRC4B* as an oncosuppressor, we induced apoptosis with doxorubicin and measured it using Annexin V and propidium iodide co-staining followed by FACS analysis (**Fig. 6a**). Forty eight hours after treatment, *LRRC4B*-overexpressing MCF-7 cells showed 10% more apoptotic and 10% fewer live cells, suggesting that *LRRC4B* overexpression could sensitize cells to doxorubicin-induced apoptosis (**Fig. 6b**). By contrast, *LRRC4B*-downregulating MDA-MB231 and BT-549 cells showed increased resistance to doxorubicin and had 25% and 10% fewer apoptotic and 25% and 10% more live cells, respectively (**Fig. 6b**). Our results provide compelling evidence that APSiC identified *LRRC4B* as a novel oncosuppressor gene in breast cancer.

## Conclusions

APSiC is a novel tool to enable systematic and robust discovery of gene dependencies from small number of samples and can conceivably be applied to other types of perturbation

screens, such as CRISPR screens. Our analysis of the DRIVE perturbation screens using APSiC is a valuable resource for the discovery of drug targets, cancer-related biomarkers and novel cancer genes, in particular of non-genetic driver genes for which a systematic analysis has been lacking. Our results would complement the associated multi-omics profiling [35,36] and drug screens [37] to understand the vulnerabilities of cancer.

## Methods

### The detailed explanation of the APSiC algorithm

In this section, we give a more technical description of APSiC and also introduce a new waterfall plot, called rank profile, for visualization of gene dependencies. First we briefly describe some necessary definitions and background material from ordered statistics. We consider the knockdown experiments of  $p$  genes across  $N$  cell lines. Let  $v_{ij}$  be viability of cell line  $i \in \{1, \dots, N\}$  upon knocking down gene  $j \in \{1, \dots, p\}$  and  $m_{ij}$  be a binary variable indicating whether a specific genetic alteration (i.e. mutation or copy number alteration) is present in gene  $j$  of cell line  $i$ . In this study, we only consider deleterious (e.g. nonsense, frameshift, splice site and mutations affecting start or stop codons) and missense mutations. Waterfall plots are often used to show viabilities of knockdown experiments for a single gene across different cell lines and are aimed to illustrate different gene dependencies. As an example, waterfall plot for gene *TP53* is shown in **Fig. 1a** (left). Each vertical bar corresponds to a cell line and is colored by the pre-existing mutation types present in *TP53*. **Fig. 1a** indicates cell lines with the presence of deleterious or missense mutations in *TP53* tend to have lower viabilities upon knockdown of this gene. While waterfall plot is a useful visualization tool for demonstrating gene dependencies, it lacks sufficient interpretability in certain cases, particularly when the number of cell lines is limited. In this paper, we introduce a new waterfall plot, named rank viability profile or simply rank profile, to address this issue.

To make viability scores comparable across cell lines, we compute normalized rank values



per cell lines denoted as  $y_{ij}$ , representing the rank of viability for gene  $j$  among all knockdown experiments in cell line  $i$ . For mathematical convenience and without loss of generality, we normalized ranks to the range of  $[0, 1]$ . When the number of knockdown genes is high, normalized ranks have many distinct levels in the interval  $[0, 1]$  and we assume normalized ranks are continuous. Let  $y_i$  denote random variables associated to ranks of a gene  $A$  in  $N$  cell lines. We drop subscript  $A$  and denote ranks as  $y_i$  for the simplicity of notation. By placing ranks,  $y_i$ , in ascending orders and renaming them, we obtain  $y_{(i)}$  where  $y_{(i)}$  is called  $i$ th ordered statistic. It is easy to see that  $y_{(i)}$  and  $y_{(N-i+1)}$ . The probability density function of ordered statistic  $y_{(i)}$  in general is given as

$$f(y_{(i)}) = N f(r) \binom{N-1}{i-1} F(r)^{i-1} (1-F(r))^{N-i}$$

where  $f(r)$  and  $F(r)$  denote probability density and cumulative distribution functions, respectively. If there is no dependency between knocking down of a gene and the viability of the cell, we can assume  $y_i$  for  $i = 1, \dots, N$ , hence we have  $y_i \sim U(0, 1)$ . Using this result, we can construct a no-change viability band at statistical significance  $\alpha$  using the quantiles of  $y_i$  at the  $\alpha/2$  and  $1-\alpha/2$  for  $i = 1, \dots, N$ . Now we define a new waterfall plot, called rank viability profile or simply rank profile, as a waterfall plot using normalized ranks, realizations of  $y_i$  for a gene, overlaid with no-change viability band (**Fig. 1a**).

The APSiC algorithm identifies potential cancer genes by assessing deviation of respective rank profiles from what is expected by chance. The algorithm can identify both genetic and non-genetic drivers (**Fig. 1b-c**). We consider three categories for genetic drivers.

- Mutation oncogene: defined as genes for which reduced viabilities are observed preferentially in samples with missense mutation.

- Amplification oncogene: defined as genes for which reduced viabilities are observed preferentially in samples with copy number amplification.
- Mutation tumor suppressor: defined as genes for which increased viabilities are observed preferentially in samples with deleterious mutation.

We consider two categories for non-genetic drivers, namely

- Non-genetic oncogene: defined as genes for which reduced viabilities are observed in samples without a genetic alteration in the respective gene.
- Non-genetic tumor suppressor: defined as genes for which increased viabilities are observed preferentially in samples without a genetic alteration in the respective gene.

For genetic drivers, the APSiC algorithm considers rank profiles of mutated and wild-type samples with respect to an input gene  $g$  (**Fig. 1b**). Then, it performs a one-sided statistical test to determine whether rank scores of the two groups of samples are significantly different in the direction of interest, according to the genetic feature of interest. Suppose  $R_1^{wt}, R_2^{wt}, \dots, R_m^{wt}$  and  $R_1^{mu}, R_2^{mu}, \dots, R_n^{mu}$  are random variables denoting rank scores upon knockdown of gene  $g$  for  $m$  wild-type and  $n$  mutated samples, respectively. Let  $\underline{R}^{wt}$  and  $\underline{R}^{mu}$  denote the average of ranks for the wild-type and mutated samples, respectively. We define  $S = \underline{R}^{mu} - \underline{R}^{wt}$  as the test statistic and  $s_{obs}$  as the observed test statistic. We assume the null hypothesis is that the knockdown of gene  $g$  does not have any impact on the viability of samples and therefore there is no difference in average of ranks for two groups, i.e.  $S = 0$ . The general formula for the distribution of any weighted sum of uniform random variables is given in Kamgar-Parsi, 1994[38]. We simplify the general formula thereby and obtain the null distribution of the test statistic  $S$  as

$$P(S \leq s) = \frac{(-1)^m}{n^n m^m (n+m)!} \sum_{k=0}^n \sum_{p=0}^m (-1)^{p+k} \frac{n}{k} \frac{m}{p} \left(s + \frac{k}{n} - \frac{p}{m}\right)^{m+n} \theta\left(s + \frac{k}{n} - \frac{p}{m}\right)$$

where

$$\theta(t) = \begin{cases} 0 & t < 0 \\ \frac{1}{2} & t = 0 \\ 1 & t > 0 \end{cases}$$

For mutation and amplification oncogenes, we compute lower-tailed  $P$  values, while for mutation tumor suppressors, we compute upper-tailed  $P$  values. Due to numerical issues, it is impractical to use the exact null distribution formula for large values of  $m$  and  $n$  ( $m+n > 20$ ). In this case, we compute an approximation for the null distribution of  $S$  as follows. Under the null hypothesis,  $\bar{X}$  and  $\bar{Y}$  follow *Bates* distributions  $Bates(m)$  and  $Bates(n)$ , respectively. The *Bates* distribution is a distribution that represents the mean of a number of independent uniform random variables on the unit interval. For large values of  $m$  and  $n$ ,  $\bar{X}$  and  $\bar{Y}$  are approximately distributed by  $\bar{X} \sim \text{Normal}(\frac{1}{2}, \frac{1}{12m})$  and  $\bar{Y} \sim \text{Normal}(\frac{1}{2}, \frac{1}{12n})$ . Hence, under the null hypothesis the test statistic  $S$  is approximately distributed as  $S \sim \text{Normal}(\frac{1}{2}, \frac{1}{12}(\frac{1}{m} + \frac{1}{n}))$ .

To identify non-genetic drivers, we only consider the wild-type (i.e. without non-synonymous mutations and without copy number amplification (GISTIC copy number state 2) or deep deletions (GISTIC copy number state -2)) samples with respect to an input gene (**Fig. 1c**). The null hypothesis is that the knockdown of a gene  $g$  does not have any impact on the viability of the samples. We define the test statistic as  $T = \frac{S}{\sqrt{V}}$  and  $t$  as the observed test statistic. Under the null hypothesis,  $T$  follows an Irwin-Hall distribution, which represents the summation of independent uniform random variables on the unit interval. For large values of  $m$ ,  $S$  is approximately distributed as  $S \sim \text{Normal}(\frac{1}{2}, \frac{1}{12m})$ . To identify non-genetic oncogenes, we require significant lower-tailed  $P$  values, for wild-type cell lines with respect to the input gene. Additionally, for the respective tissue type, the overall expression at the RNA level of a putative oncogene in tumor samples is required to be significantly higher than the one in normal tissue samples using the  $t$  test. On the contrary, for identifying non-genetic tumor suppressors, we require significant upper-tailed  $P$

values,  $P(T \geq t_{obs})$ , for wild-type cell lines with respect to the input gene as well as lower RNA expression of tumor samples in comparison to normal tissue samples using the  $t$  test.

## Downloading and preprocessing of DRIVE and TCGA data

We considered the viability profiles of 383 cell lines in the project DRIVE [4] for which their genetic profiles were available at the Cancer Cell Line Encyclopedia (**Fig. 2a**) [10]. We computed aggregated gene-level viability scores for each experiment by the RSA and ATARIS algorithms [13,14]. The RSA and ATARIS scores are available for 7726 and 6557 genes, respectively. We used the same method as defined in the project DRIVE to remove essential genes, defined as genes with an RSA value of  $\leq 3$  in more than half of cell lines [4]. After the removal of 184 essential genes by this method, for pan-cancer analysis, the ATARIS scores are available for 6373 genes in 383 cell lines in 39 cancer types over 17 primary tissues. For the genetic drivers, we considered only genes for which there are at least 2 samples harbored a genetic alteration of the corresponding class in individual cancer types. For the non-genetic drivers, we only considered genes for which there are at least 2 samples wild-type for the gene in individual cancer types. For pan-cancer analysis, the above threshold was at least 4 samples for both genetic and non-genetic drivers. For the identification of mutation tumor suppressor genes, mutations annotated as *In\_Frame\_Ins*, *In\_Frame\_Del*, *Frame\_Shift\_Ins*, *Frame\_Shift\_Del*, *Nonsense\_Mutation*, *Splice\_Site*, *Start\_Codon\_Del*, *Stop\_Codon\_Del*, *Stop\_Codon\_Ins*, *Start\_Codon\_Ins* were considered deleterious. For the analysis of individual cancer types, we considered the 26 cancer types for which more than four cell lines are available in the DRIVE data.

TCGA gene expression data was obtained for 12 cancers for which data are available for tumor and normal tissues (**Additional file 8**). The data were downloaded using the TCGAbiolinks package in R [39]. The normalized expression level of genes in CPM (counts per million) were used for the identification of non-genetic drivers.

## Multiple testing

To address the multiple comparisons problem, we chose a significance level such that the expected number of false positives due to multiple testing for each cancer and feature is equal to one. To this end, we chose a significance level of  $1/n$ , or 0.05 if  $1/n > 0.05$ , where  $n$  is the number of genes tested for identification of drivers. Using this approach, we were able to keep many interesting hits while keeping the number of false positive cases low.

## Clustering and pathway analysis

Clustering was performed using ConsensusClusterPlus Bioconductor package in R [40] using 1-Spearman correlation as the distance metric and the Ward hierarchical clustering algorithm. The number of clusters was determined based on the relative change in area under the consensus cumulative distribution function over the number of evaluated clusters. Pathway analysis was performed using g:Profiler [41].

## Cell lines

Breast cancer derived cell lines (MCF-7, BT-549 and MDA-MB231) were maintained in a 5% CO<sub>2</sub>-humidified atmosphere at 37°C and cultured in DMEM supplemented with 10% FBS, 1% Pen/Strep (Bio-Concept) and 1% MEM-NEAA (MEM non-essential amino acids, ThermoFisher Scientific). All cell lines were confirmed negative for mycoplasma infection using the PCR-based Universal Mycoplasma Detection kit (American Type Culture Collection, Manassas, VA) as previously described [42].

## Transient gene knockdown by siRNAs

Transient gene knockdown was conducted using ON-TARGET plus siRNA transfection. ON-TARGET plus SMARTpool siRNAs against human *LRRC4B* (Dharmacon, CO; #L-023786-01-0005), ON-TARGET plus SMARTpool non-targeting control and DharmaFECT transfection reagent (Dharmacon, CO; #T-2001-03) were all purchased from GE

Dharmacon. Transfection was performed according to the manufacturer's protocol. Briefly, log-phase breast cancer cells were seeded at approximately 60% confluence. Because antibiotics affects the knockdown efficiency of ON-TARGET plus siRNAs, growth medium was removed as much as possible and replaced by antibiotic-free complete medium. siRNAs were added to a final concentration of 25 nM. Cells were incubated at 37°C in 5% CO<sub>2</sub> for 24-48-72 hours for 48-72 hours for protein analysis. To avoid cytotoxicity, transfection medium was replaced with complete medium after 8 hours.

# **Protein extraction and western blot**

Proteins were extracted using Co-IP buffer (100 mmol/L NaCl, 50 mmol/L Tris pH 7.5, 1 mmol/L EDTA, 0.1% Triton X-100) supplemented with 1x protease inhibitors (cOmplete Mini, EDTA-free Protease Inhibitor Cocktail, Roche, CO, #4693159001) and 1x phosphatase inhibitors (PhosSTOP #4906837001, Merck). Cell lysates were then treated with 10x reducing agent (NuPAGE Sample Reducing Agent, Invitrogen, #NP0009), 4x loading buffer (NuPAGE LDS Sample Buffer, Invitrogen, #NP0007), boiled and loaded into neutral pH, pre-cast, discontinuous SDS-PAGE mini-gel system (NuPAGE 10% Bis-Tris Protein Gels, ThermoFisher). The proteins were then transferred to nitrocellulose membranes using Trans-Blot Turbo Transfer System (Bio-Rad). The membranes were blocked for 1 hr with Sure Block (Lubio Science) and then probed with primary antibodies overnight at 4°C. Next day, the membranes were incubated for 1 hr at RT with fluorescent secondary goat anti-mouse (IRDye 680) or anti-rabbit (IRDye 800) antibodies (both from LI-COR Biosciences). Blots were scanned using the Odyssey Infrared Imaging System (LI-COR Biosciences) and band intensity was quantified using ImageJ software. The ratio of proteins of interest/loading control in treated samples were normalized to their counterparts in control cells. Antibodies against LRRC4B (PA5-23529, Thermofisher) and B-actin (A5441, Sigma) were used at dilution 1:1000 and 1:5000, respectively.

# **Proliferation assay**

Cell proliferation was assayed using the xCELLigence system (RTCA, ACEA Biosciences, San Diego, CA, USA) as previously described.[43] Cells were first seeded and transfected in 6 well plates and 24 h after transfection  $5 \times 10^3$  cells were resuspended in 100  $\mu$ l of medium and plated in each well of an E-plate 16. Background impedance of the xCELLigence system was measured for 12 s using 50  $\mu$ l of room temperature cell culture media in each well of E-plate 16. The final volume in each well was then 150  $\mu$ l. The impedance signals were recorded every 15 minutes until 96/120 h and expressed as cell index values, calculated automatically and normalized by the RTCA Software Package v1.2. The values were defined as mean  $\pm$  standard deviation. Mann-Whitney test was used for statistical analysis with GraphPad software.

### **Migration assay**

Migration assays were performed using the CIM-plate of the xCELLigence Real-Time Cell Analysis (RTCA, ACEA Biosciences, San Diego, CA, USA) system. Cells were first transfected in 6-well plates and 24 h after transfection, they were harvested and seeded in the CIM-plate. Every well of the bottom chamber was filled with 160  $\mu$ l of the corresponding medium at 10% FBS concentration. After placing the upper chamber on top of the lower chamber, 50  $\mu$ l of serum free medium was added on each CIM well for the background measurement. After 3x PBS washing,  $3 \times 10^4$  cells re-suspended in 100  $\mu$ l of the corresponding medium at 1% FBS concentration were seeded in each well of the upper chamber. The measurements were taken every 15 minutes until 24 h after seeding and expressed as cell index values. Mann-Whitney U test was used for statistical analysis with GraphPad software.

### **Cell cycle analysis**

Seventy-two hour after transfection, cells were collected, stained with DAPI and analyzed by flow cytometry using the BD FACS Canto II cytometer (BD Biosciences, USA). Briefly cells were harvested and washed 2X in PBS to get rid of serum proteins at 1200 rpm for 5

minutes. Pellets (up to  $3 \times 10^6$  cells) were resuspended in 1.2 ml PBS (Ca and Mg free). For crosslinking proteins 3.0 ml of 95% ice cold EtOH was added dropwise while vortexing. Cells were fixed in this final 70% Et-OH solution for at least 30 minutes or over night. The Et-OH/cell suspension was then diluted with 12 ml of PBS (for a total volume of 15 ml) and centrifuge at 2000-2200 rpm for 10 min. Cells were then washed once more with 15 ml PBS and then resuspended in 0.5-2.0 ml of DAPI stain solution (0.1% TritonX 100 and 10 ug/ml). After 30 min of incubation on ice cells were analyzed by flow cytometry, measuring the fluorescence emission at 461 nm. Data were analysed using the FlowJo software version 10.5.3 (<https://www.flowjo.com>).

# **Apoptosis analysis by flow cytometry**

BT-549 and MDA-MB231 cells were transfected with siRNA (control or against *LRRC4B*) and MCF-7 cells were transfected with *LRRC4B* overexpressing plasmid or control plasmid. Eight hours after transfection medium was changed and doxorubicin added according to the respective IC50 for each cell line[44]<sup>[45]</sup>. Cells were collected 60 hours post siRNA transfection or *LRRC4B* overexpression and 48 hours post treatment with doxorubicin respectively, stained with annexin V (Annexin V-FITC conjugate; Invitrogen, CO; #V13242) and propidium iodide (PI; Invitrogen, CO; #V13242), and analyzed by flow cytometry using the BD FACS Canto II cytometer (BD Biosciences, USA). Briefly, cells were harvested after incubation period and washed twice by centrifugation (1,200 g, 5 min) in cold phosphate-buffered saline (DPBS; Gibco, CO; #14040133). After washing, cells were resuspended in 0.15 ml AnnV binding buffer 1X (ABB 5X, Invitrogen, CO; #V13242; 50 mM HEPES, 700 mM NaCl, and 12.5 mM CaCl<sub>2</sub> at pH 7.4) containing fluorochrome-conjugated AnnV and PI (PI to a final concentration of 1 ug/ml) and incubated in darkness at room temperature for 15 min. As soon as possible cells were analyzed by flow cytometry, measuring the fluorescence emission at 530 nm and >575 nm. Data were analysed using the FlowJo software version 10.5.3 (<https://www.flowjo.com>).



## Declarations

### Ethics approval and consent to participate

Not applicable

### Consent for publication

Not applicable

### Availability of data and materials

The dataset supporting the conclusions of this article is included as **Additional Files 1-5**. A web portal using the Shiny framework in R has been developed to visualize rank profiles of the DRIVE shRNA screen and corresponding gene expression data from TCGA at <https://apsic.shinyapps.io/APSiC/>. The code for the APSiC algorithm is available at <https://github.com/hesmon/APSiC/>. The raw shRNA data has already published as a part of the project DRIVE (<https://data.mendeley.com/datasets/y3ds55n88r/4>) and copy number and mutation profiles of the cell lines are available at the Cancer Cell Line Encyclopedia portal (<https://portals.broadinstitute.org/ccle/home>). The gene expression data from the TCGA are available at the TCGA Genomics Data Commons data portal (<https://portal.gdc.cancer.gov/>).

### Competing interests

A.dW. and G.R. are employees of Novartis Pharma AG. The other authors declare that they have no competing interests.

### Funding

V.P. was supported by the Swiss Centre for Applied Human Toxicology. L.M.T. and S.P. were supported by the Swiss Cancer League (KLS-3639-02-2015 and KFS-3995-08-2016, respectively). S.P. was supported by Swiss National Science Foundation (PZ00P3\_168165). N.B. was supported by European Research Council Synergy Grant 609883. The funders had

no role in study design, data collection and analysis, decision to publish, or preparation of the manuscript.

## Authors' contributions

H.M., S.P. and C.K.Y.N. conceived the study. S.P. and C.K.Y.N. supervised the study. H.M. and C.K.Y.N. developed the methodology. H.M. performed the bioinformatic analyses. E.Z. contributed to data presentation and visualization. H.M. and E.Z. implemented the Shiny web application. M.C.-L., G.B., S.T.-M., V.P. and M.L. performed *in vitro* experiments. S.S., A.dW., G.R., M.B., N.B., M.vF. and L.M.T. critically discussed the results. H.M., M.C.-L., G.B., S.P. and C.K.Y.N. interpreted the results and wrote the manuscript. All authors agreed to the final version of the manuscript.

## Acknowledgments

Development of APSiC was performed at sciCORE scientific computing center at the University of Basel and at the scientific computing center of the Department of Bioinformatics, University of Tehran.

## References

1. Cheung HW, Cowley GS, Weir BA, Boehm JS, Rusin S, Scott JA, et al. Systematic investigation of genetic vulnerabilities across cancer cell lines reveals lineage-specific dependencies in ovarian cancer. *Proc Natl Acad Sci U S A*. 2011;108:12372–7.
2. Marcotte R, Brown KR, Suarez F, Sayad A, Karamboulas K, Krzyzanowski PM, et al. Essential gene profiles in breast, pancreatic, and ovarian cancer cells. *Cancer Discov*. 2012;2:172–89.
3. Meyers RM, Bryan JG, McFarland JM, Weir BA, Sizemore AE, Xu H, et al. Computational correction of copy number effect improves specificity of CRISPR-Cas9 essentiality screens in cancer cells. *Nat Genet*. 2017;49:1779–84.
4. McDonald ER 3rd, de Weck A, Schlabach MR, Billy E, Mavrakis KJ, Hoffman GR, et al. Project DRIVE: A Compendium of Cancer Dependencies and Synthetic Lethal Relationships Uncovered by Large-Scale, Deep RNAi Screening. *Cell*. 2017;170:577–92.e10.
5. Marcotte R, Sayad A, Brown KR, Sanchez-Garcia F, Reimand J, Haider M, et al. Functional Genomic Landscape of Human Breast Cancer Drivers, Vulnerabilities, and

597 Resistance. *Cell*. 2016;164:293–309.

598 6. Ding L, Bailey MH, Porta-Pardo E, Thorsson V, Colaprico A, Bertrand D, et al. Perspective  
599 on Oncogenic Processes at the End of the Beginning of Cancer Genomics. *Cell*.  
600 2018;173:305–20.e10.

601 7. Lawrence MS, Stojanov P, Mermel CH, Robinson JT, Garraway LA, Golub TR, et al.  
602 Discovery and saturation analysis of cancer genes across 21 tumour types. *Nature*.  
603 2014;505:495–501.

604 8. Bailey MH, Tokheim C, Porta-Pardo E, Sengupta S, Bertrand D, Weerasinghe A, et al.  
605 Comprehensive Characterization of Cancer Driver Genes and Mutations. *Cell*.  
606 2018;173:371–85.e18.

607 9. Wang Y, Xu X, Maglic D, Dill MT, Mojumdar K, Ng PK-S, et al. Comprehensive Molecular  
608 Characterization of the Hippo Signaling Pathway in Cancer. *Cell Rep*. 2018;25:1304–17.e5.

609 10. Barretina J, Caponigro G, Stransky N, Venkatesan K, Margolin AA, Kim S, et al. The  
610 Cancer Cell Line Encyclopedia enables predictive modelling of anticancer drug sensitivity.  
611 *Nature*. 2012;483:603–7.

612 11. Tsherniak A, Vazquez F, Montgomery PG, Weir BA, Kryukov G, Cowley GS, et al.  
613 Defining a Cancer Dependency Map. *Cell*. 2017;170:564–76.e16.

614 12. Schleich F, Szczurek E, Kreibich S, Dilling S, Andritschke D, Casanova A, et al. gespeR:  
615 a statistical model for deconvoluting off-target-confounded RNA interference screens.  
616 *Genome Biol*. 2015;16:220.

617 13. Shao DD, Tsherniak A, Gopal S, Weir BA, Tamayo P, Stransky N, et al. ATARiS:  
618 computational quantification of gene suppression phenotypes from multisample RNAi  
619 screens. *Genome Res*. 2013;23:665–78.

620 14. König R, Chiang C-Y, Tu BP, Yan SF, DeJesus PD, Romero A, et al. A probability-based  
621 approach for the analysis of large-scale RNAi screens. *Nat Methods*. 2007;4:847–9.

622 15. McFarland JM, Ho ZV, Kugener G, Dempster JM, Montgomery PG, Bryan JG, et al.  
623 Improved estimation of cancer dependencies from large-scale RNAi screens using model-  
624 based normalization and data integration. *Nat Commun*. 2018;9:4610.

625 16. Szczurek E, Misra N, Vingron M. Synthetic sickness or lethality points at candidate  
626 combination therapy targets in glioblastoma [Internet]. *International Journal of Cancer*. 2013.  
627 p. 2123–32. Available from: <http://dx.doi.org/10.1002/ijc.28235>

628 17. Jerby-Aron L, Pfitzer N, Waldman YY, McGarry L, James D, Shanks E, et al.  
629 Predicting cancer-specific vulnerability via data-driven detection of synthetic lethality. *Cell*.  
630 2014;158:1199–209.

631 18. Sinha S, Thomas D, Chan S, Gao Y, Brunen D, Torabi D, et al. Systematic discovery of  
632 mutation-specific synthetic lethals by mining pan-cancer human primary tumor data. *Nat*  
633 *Commun*. 2017;8:15580.

634 19. Sahoo D, Dill DL, Gentles AJ, Tibshirani R, Plevritis SK. Boolean implication networks  
635 derived from large scale, whole genome microarray datasets. *Genome Biol*. 2008;9:R157.

636 20. Sinha S, Tsang EK, Zeng H, Meister M, Dill DL. Mining TCGA data using Boolean  
637 implications. *PLoS One*. 2014;9:e102119.

- 638 21. Srivatsa S, Montazeri H, Bianco G, Coto-Llerena M, Ng CKY, Piscuoglio S, et al.  
639 Discovery of synthetic lethal interactions from large-scale pan-cancer perturbation screens  
640 [Internet]. Available from: <http://dx.doi.org/10.1101/810374>
- 641 22. Dimitrakopoulos C, Hindupur SK, Häfliger L, Behr J, Montazeri H, Hall MN, et al.  
642 Network-based integration of multi-omics data for prioritizing cancer genes. *Bioinformatics*.  
643 2018;34:2441–8.
- 644 23. Wang P, Guo J, Wang F, Shi T, Ma D. Human SBK1 is dysregulated in multiple cancers  
645 and promotes survival of ovary cancer SK-OV-3 cells. *Mol Biol Rep*. 2011;38:3551–9.
- 646 24. Kent OA, Fox-Talbot K, Halushka MK. RREB1 repressed miR-143/145 modulates KRAS  
647 signaling through downregulation of multiple targets. *Oncogene*. 2013;32:2576–85.
- 648 25. Cillo C, Schiavo G, Cantile M, Bihl MP, Sorrentino P, Carafa V, et al. The HOX gene  
649 network in hepatocellular carcinoma. *Int J Cancer*. 2011;129:2577–87.
- 650 26. Hoadley KA, Yau C, Hinoue T, Wolf DM, Lazar AJ, Drill E, et al. Cell-of-Origin Patterns  
651 Dominate the Molecular Classification of 10,000 Tumors from 33 Types of Cancer. *Cell*.  
652 2018;173:291–304.e6.
- 653 27. Yi F, Wang Z, Liu J, Zhang Y, Wang Z, Xu H, et al. Structural Maintenance of  
654 Chromosomes protein 1: Role in Genome Stability and Tumorigenesis. *Int J Biol Sci*.  
655 2017;13:1092–9.
- 656 28. Lin T-C, Su C-Y, Wu P-Y, Lai T-C, Pan W-A, Jan Y-H, et al. The nucleolar protein NIFK  
657 promotes cancer progression via CK1 $\alpha$ / $\beta$ -catenin in metastasis and Ki-67-dependent cell  
658 proliferation. *Elife* [Internet]. 2016;5. Available from: <http://dx.doi.org/10.7554/eLife.11288>
- 659 29. Perra A, Kowalik MA, Ghiso E, Ledda-Columbano GM, Di Tommaso L, Angioni MM, et  
660 al. YAP activation is an early event and a potential therapeutic target in liver cancer  
661 development [Internet]. *Journal of Hepatology*. 2014. p. 1088–96. Available from:  
662 <http://dx.doi.org/10.1016/j.jhep.2014.06.033>
- 663 30. Cuiffo BG, Campagne A, Bell GW, Lembo A, Orso F, Lien EC, et al. MSC-regulated  
664 microRNAs converge on the transcription factor FOXP2 and promote breast cancer  
665 metastasis. *Cell Stem Cell*. 2014;15:762–74.
- 666 31. Wu M, Huang C, Gan K, Huang H, Chen Q, Ouyang J, et al. LRRC4, a putative tumor  
667 suppressor gene, requires a functional leucine-rich repeat cassette domain to inhibit  
668 proliferation of glioma cells in vitro by modulating the extracellular signal-regulated  
669 kinase/protein kinase B/nuclear factor-kappaB pathway. *Mol Biol Cell*. 2006;17:3534–42.
- 670 32. Zhang Q-H, Wang L-L, Cao L, Peng C, Li X-L, Tang K, et al. Study of a novel brain  
671 relatively specific gene LRRC4 involved in glioma tumorigenesis suppression using the Tet-  
672 on system. *Acta Biochim Biophys Sin* . 2005;37:532–40.
- 673 33. Wang R, Wang Z, Yang J, Liu X, Wang L, Guo X, et al. LRRC4 inhibits the proliferation  
674 of human glioma cells by modulating the expression of STMN1 and microtubule  
675 polymerization. *J Cell Biochem*. 2011;112:3621–9.
- 676 34. Hanahan D, Weinberg RA. Hallmarks of Cancer: The Next Generation [Internet]. *Cell*.  
677 2011. p. 646–74. Available from: <http://dx.doi.org/10.1016/j.cell.2011.02.013>
- 678 35. Ghandi M, Huang FW, Jané-Valbuena J, Kryukov GV, Lo CC, McDonald ER 3rd, et al.  
679 Next-generation characterization of the Cancer Cell Line Encyclopedia. *Nature*.

- 2019;569:503–8.
36. Li H, Ning S, Ghandi M, Kryukov GV, Gopal S, Deik A, et al. The landscape of cancer cell line metabolism. *Nat Med*. 2019;25:850–60.
37. Iorio F, Knijnenburg TA, Vis DJ, Bignell GR, Menden MP, Schubert M, et al. A Landscape of Pharmacogenomic Interactions in Cancer. *Cell*. 2016;166:740–54.
38. Kamgar-Parsi B, Kamgar-Parsi B, Brosh M. Distribution and moments of the weighted sum of uniforms random variables, with applications in reducing monte carlo simulations [Internet]. *Journal of Statistical Computation and Simulation*. 1995. p. 399–414. Available from: <http://dx.doi.org/10.1080/00949659508811688>
39. Colaprico A, Silva TC, Olsen C, Garofano L, Cava C, Garolini D, et al. TCGAbiolinks: an R/Bioconductor package for integrative analysis of TCGA data [Internet]. *Nucleic Acids Research*. 2016. p. e71–e71. Available from: <http://dx.doi.org/10.1093/nar/gkv1507>
40. Wilkerson MD, Hayes DN. ConsensusClusterPlus: a class discovery tool with confidence assessments and item tracking. *Bioinformatics*. 2010;26:1572–3.
41. Raudvere U, Kolberg L, Kuzmin I, Arak T, Adler P, Peterson H, et al. g:Profiler: a web server for functional enrichment analysis and conversions of gene lists (2019 update). *Nucleic Acids Res*. 2019;47:W191–8.
42. Ng CKY, Martelotto LG, Gauthier A, Wen H-C, Piscuoglio S, Lim RS, et al. Intra-tumor genetic heterogeneity and alternative driver genetic alterations in breast cancers with heterogeneous HER2 gene amplification. *Genome Biol*. 2015;16:107.
43. Andreozzi M, Quintavalle C, Benz D, Quagliata L, Matter M, Calabrese D, et al. HMGA1 Expression in Human Hepatocellular Carcinoma Correlates with Poor Prognosis and Promotes Tumor Growth and Migration in in vitro Models. *Neoplasia*. 2016;18:724–31.
44. Pilco-Ferreto N, Calaf GM. Influence of doxorubicin on apoptosis and oxidative stress in breast cancer cell lines. *Int J Oncol*. 2016;49:753–62.
45. Inao T, Iida Y, Moritani T, Okimoto T, Tanino R, Kotani H, et al. Bcl-2 inhibition sensitizes triple-negative human breast cancer cells to doxorubicin. *Oncotarget*. 2018;9:25545–56.

## Figure legends

**Fig. 1. Overview of the APSiC algorithm.** **a**, Illustration of the transformation from the raw cell viability scores for a given gene (left, using *TP53* as an example) to the rank profile (right). Each bar of the waterfall plots represents one sample and is colored by the mutational status of the given gene in the sample. The red ellipse in the rank profile (right) represents a no-change (random) viability band. **b-c**, Schematic representation of the APSiC algorithm for identifying **(b)** genetic and **(c)** non-genetic drivers (See Materials and Methods for details).

**Fig. 2. Analysis of the genetic drivers in the DRIVE perturbation screen.** **a**, The number of cell lines available for 26 cancer subtypes in the DRIVE perturbation screen. **b**, Kernel density estimation of the  $P$  values (on a  $-\log_{10}$  scale) for genetic drivers using the APSiC algorithm in a pan-cancer analysis. Candidate mutation oncogenes, amplification oncogenes, and mutation tumor suppressors identified by the APSiC are shown, with genes reaching significance level after multiple testing corrections highlighted in red. **c**, Rank profile for a mutation oncogene (*BRAF*) colored by mutation status. **d**, Rank profile of an amplification oncogene (*KRAS*) colored by copy number status. **e**, Rank profile of a mutation tumor suppressor (*ARID1A*) colored by mutation status. **f**, Dot plots of the  $P$  values (on a  $-\log_{10}$  scale) for genetic drivers using the APSiC algorithm in a cancer type-specific analysis, for (top) mutation oncogenes, (middle) amplification oncogenes and (bottom) mutation tumor suppressors. Genes reaching significance level after multiple testing corrections are highlighted in red. Cancer types are sorted by the number of cell lines.

**Fig. 3: Pan-cancer analysis of the non-genetic drivers in the DRIVE perturbation screen.** **a**, Heatmap illustrates consensus clustering of the 500 most variable  $P$  values for non-genetic drivers using the APSiC algorithm for the 26 cancer types in the DRIVE perturbation screen. Consensus clustering identified 4 clusters across cancer types and 5 clusters across the 500 genes. One of the clusters was enriched for genes involved in mRNA splicing and processing. **b**, Rank profiles for *PRPF6* in (top) non-Hodgkin B-cell lymphoma and (bottom) upper aerodigestive tract carcinoma and for *SART3* in (top) PNET neuroblastoma and (bottom) breast carcinoma.

**Fig. 4: Cancer type-specific analysis of the non-genetic drivers in the DRIVE perturbation screen.** Non-genetic driver genes identified in the 12 cancer types with corresponding gene expression data from the TCGA. APSiC  $P$  values are shown (on a  $-\log_{10}$  scale) for driver genes significant after multiple testing corrections and over- or underexpressed in human cancers for oncogenes (in red) and tumor suppressor genes (in blue), respectively. The top 20 genes for each cancer type are labelled.

**Fig. 5: *LRRC4B* has tumor suppressor-like properties in *in-vitro* models of breast cancer.** **a**, **e**, **i**, Western blotting showing *LRRC4B* protein level in (a) MDA-MB231, (e) BT-549 and (i) MCF-7 cell

lines 48 and 72 hours post transfection. Actin was used as a loading control and for normalization. **b**, **f**, **j**, Proliferation kinetics of **(b)** MDA-MB231, **(f)** BT-549 and **(j)** MCF-7 cells upon **(b, f)** downregulation or **(j)** upregulation of *LRRC4B* compared with the control. **c**, **g**, **k**, Migration potential of **(c)** MDA-MB231, **(g)** BT-549 and **(k)** MCF-7 cells upon **(c, g)** downregulation or **(k)** upregulation of *LRRC4B* compared with the control. **d**, **h**, **i**, Cell cycle analysis of **(d)** MDA-MB231, **(h)** BT-549 and **(i)** MCF-7 cells upon **(d, h)** downregulation or **(i)** upregulation of *LRRC4B* compared with the control. Error bars represent standard deviation obtained from three independent experiments. For all experiments, statistical significance was assessed by multiple t-tests (\*  $P < 0.05$ , \*\*  $P < 0.01$ , \*\*\*  $P < 0.001$ ).

**Fig. 6: *LRRC4B* expression modulates induction of apoptosis by Doxorubicin.** **a**, Dot plot illustrating the flow cytometry gating strategy used to assess cell viability and apoptosis using Annexin V and propidium iodide staining of MDA-MB231, BT-549 and MCF-7 cells upon downregulation/upregulation of *LRRC4B* compared with the control cells, with and without Doxorubicin. **b**, Quantification of the mean (+/- SD) percentage of apoptotic cells (AnnV+) and live cells (AnnV-/PI-) across the different groups. Error bars represent standard deviation obtained from three independent experiments. For all experiments, statistical significance was assessed by multiple t-tests (\*  $P < 0.05$ , \*\*  $P < 0.01$ , \*\*\*  $P < 0.001$ ).

## Additional files

**Additional file 1:** APSiC analysis of mutation oncogenes in DRIVE

**Additional file 2:** APSiC analysis of amplification oncogenes in DRIVE

**Additional file 3:** APSiC analysis of mutation tumor suppressors in DRIVE

**Additional file 4:** APSiC analysis of non-genetic oncogenes in DRIVE

**Additional file 5:** APSiC analysis of non-genetic tumor suppressors in DRIVE



775

776 **Additional file 6:** Significant genetic drivers identified by APSiC in the pan-cancer analysis  
777 of DRIVE

778

779 **Additional file 7:** Rank profiles of *DDX27*, *DCAF8L2* and *RBM39* in DRIVE

780

781 **Additional file 8:** Pathological annotation in the DRIVE project and the corresponding TCGA  
782 projects used for gene expression analysis.

783

784 **Additional file 8: a,** (left) Rank profile of the *LRRC4B* gene in breast cancer cell lines. Each  
785 bar in the waterfall plots represents one cell line and is colored by the mutation status. (right)  
786 *LRRC4B* transcript expression in breast cancers and normal tissues. The plot was generated  
787 using gene expression data obtained from the TCGA dataset. **b,** Screening of *LRRC4B*  
788 protein expression in a panel of breast cancer cell lines by western blot. Ratio of *LRRC4B*  
789 expression relative to actin were calculated for each cell line. Ratio are shown above the  
790 western blot plot. **c,** Dot plot showing the flow cytometry gating strategy used to assess cell  
791 cycle status on breast cancer cell lines in both overexpressing and downregulating *LRRC4B*  
792 cells. (\*\* $P < 0.001$ ).

793



# Fig. 1

**a**

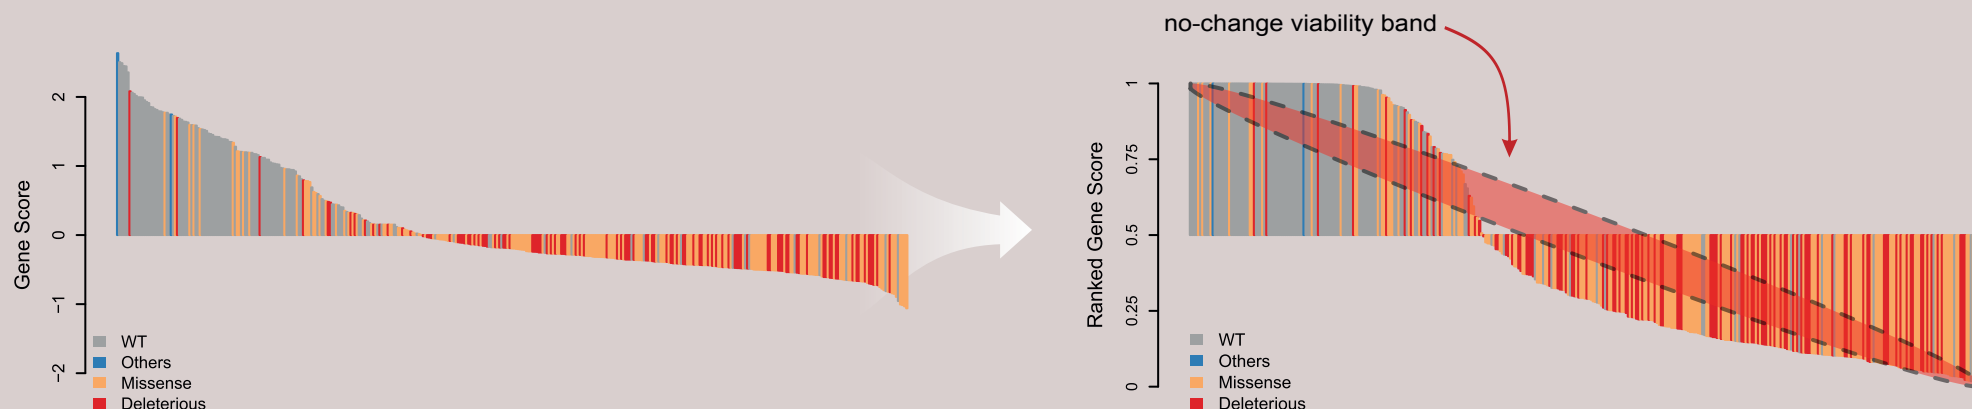

**b**

## APSiC Algorithm- Genetic Drivers

### Input data:

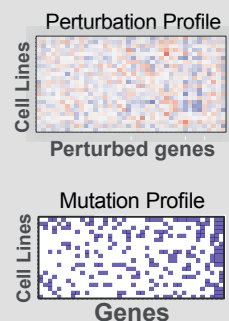

### input genes

### 1. For each gene, compute rank profile of all cell lines

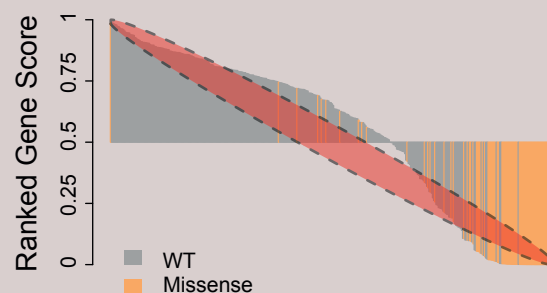

### 2. Compare normalized ranks of altered and non-altered cell lines

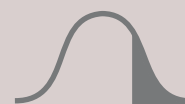

**One-sided statistical test**  
Under the null hypothesis, sample means of ranks follow bates distribution

### Output:

**Candidate genetic drivers**

mutation oncogene

amplification oncogene

mutation tumor suppressor

**c**

## APSiC Algorithm- Non-Genetic Drivers

### Input data:

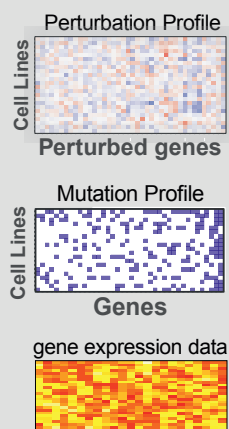

### input genes

### 1. For each gene, compute rank profile for wild-type cell lines

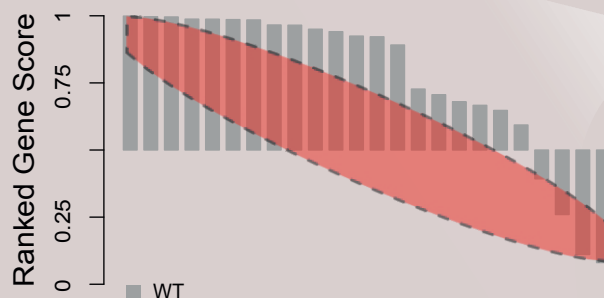

### 2. Assess the deviation from random rank profile

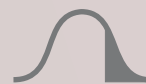

**One-sided statistical test**  
Under the null hypothesis, sample sums of ranks follow Bates distribution (One-sided Irwin-Hall test)

### 3. Filtering

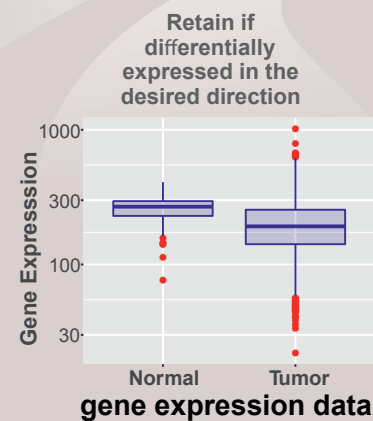

### Output:

**Candidate non-genetic drivers**

non-genetic oncogene

non-genetic tumor suppressor

Fig. 2

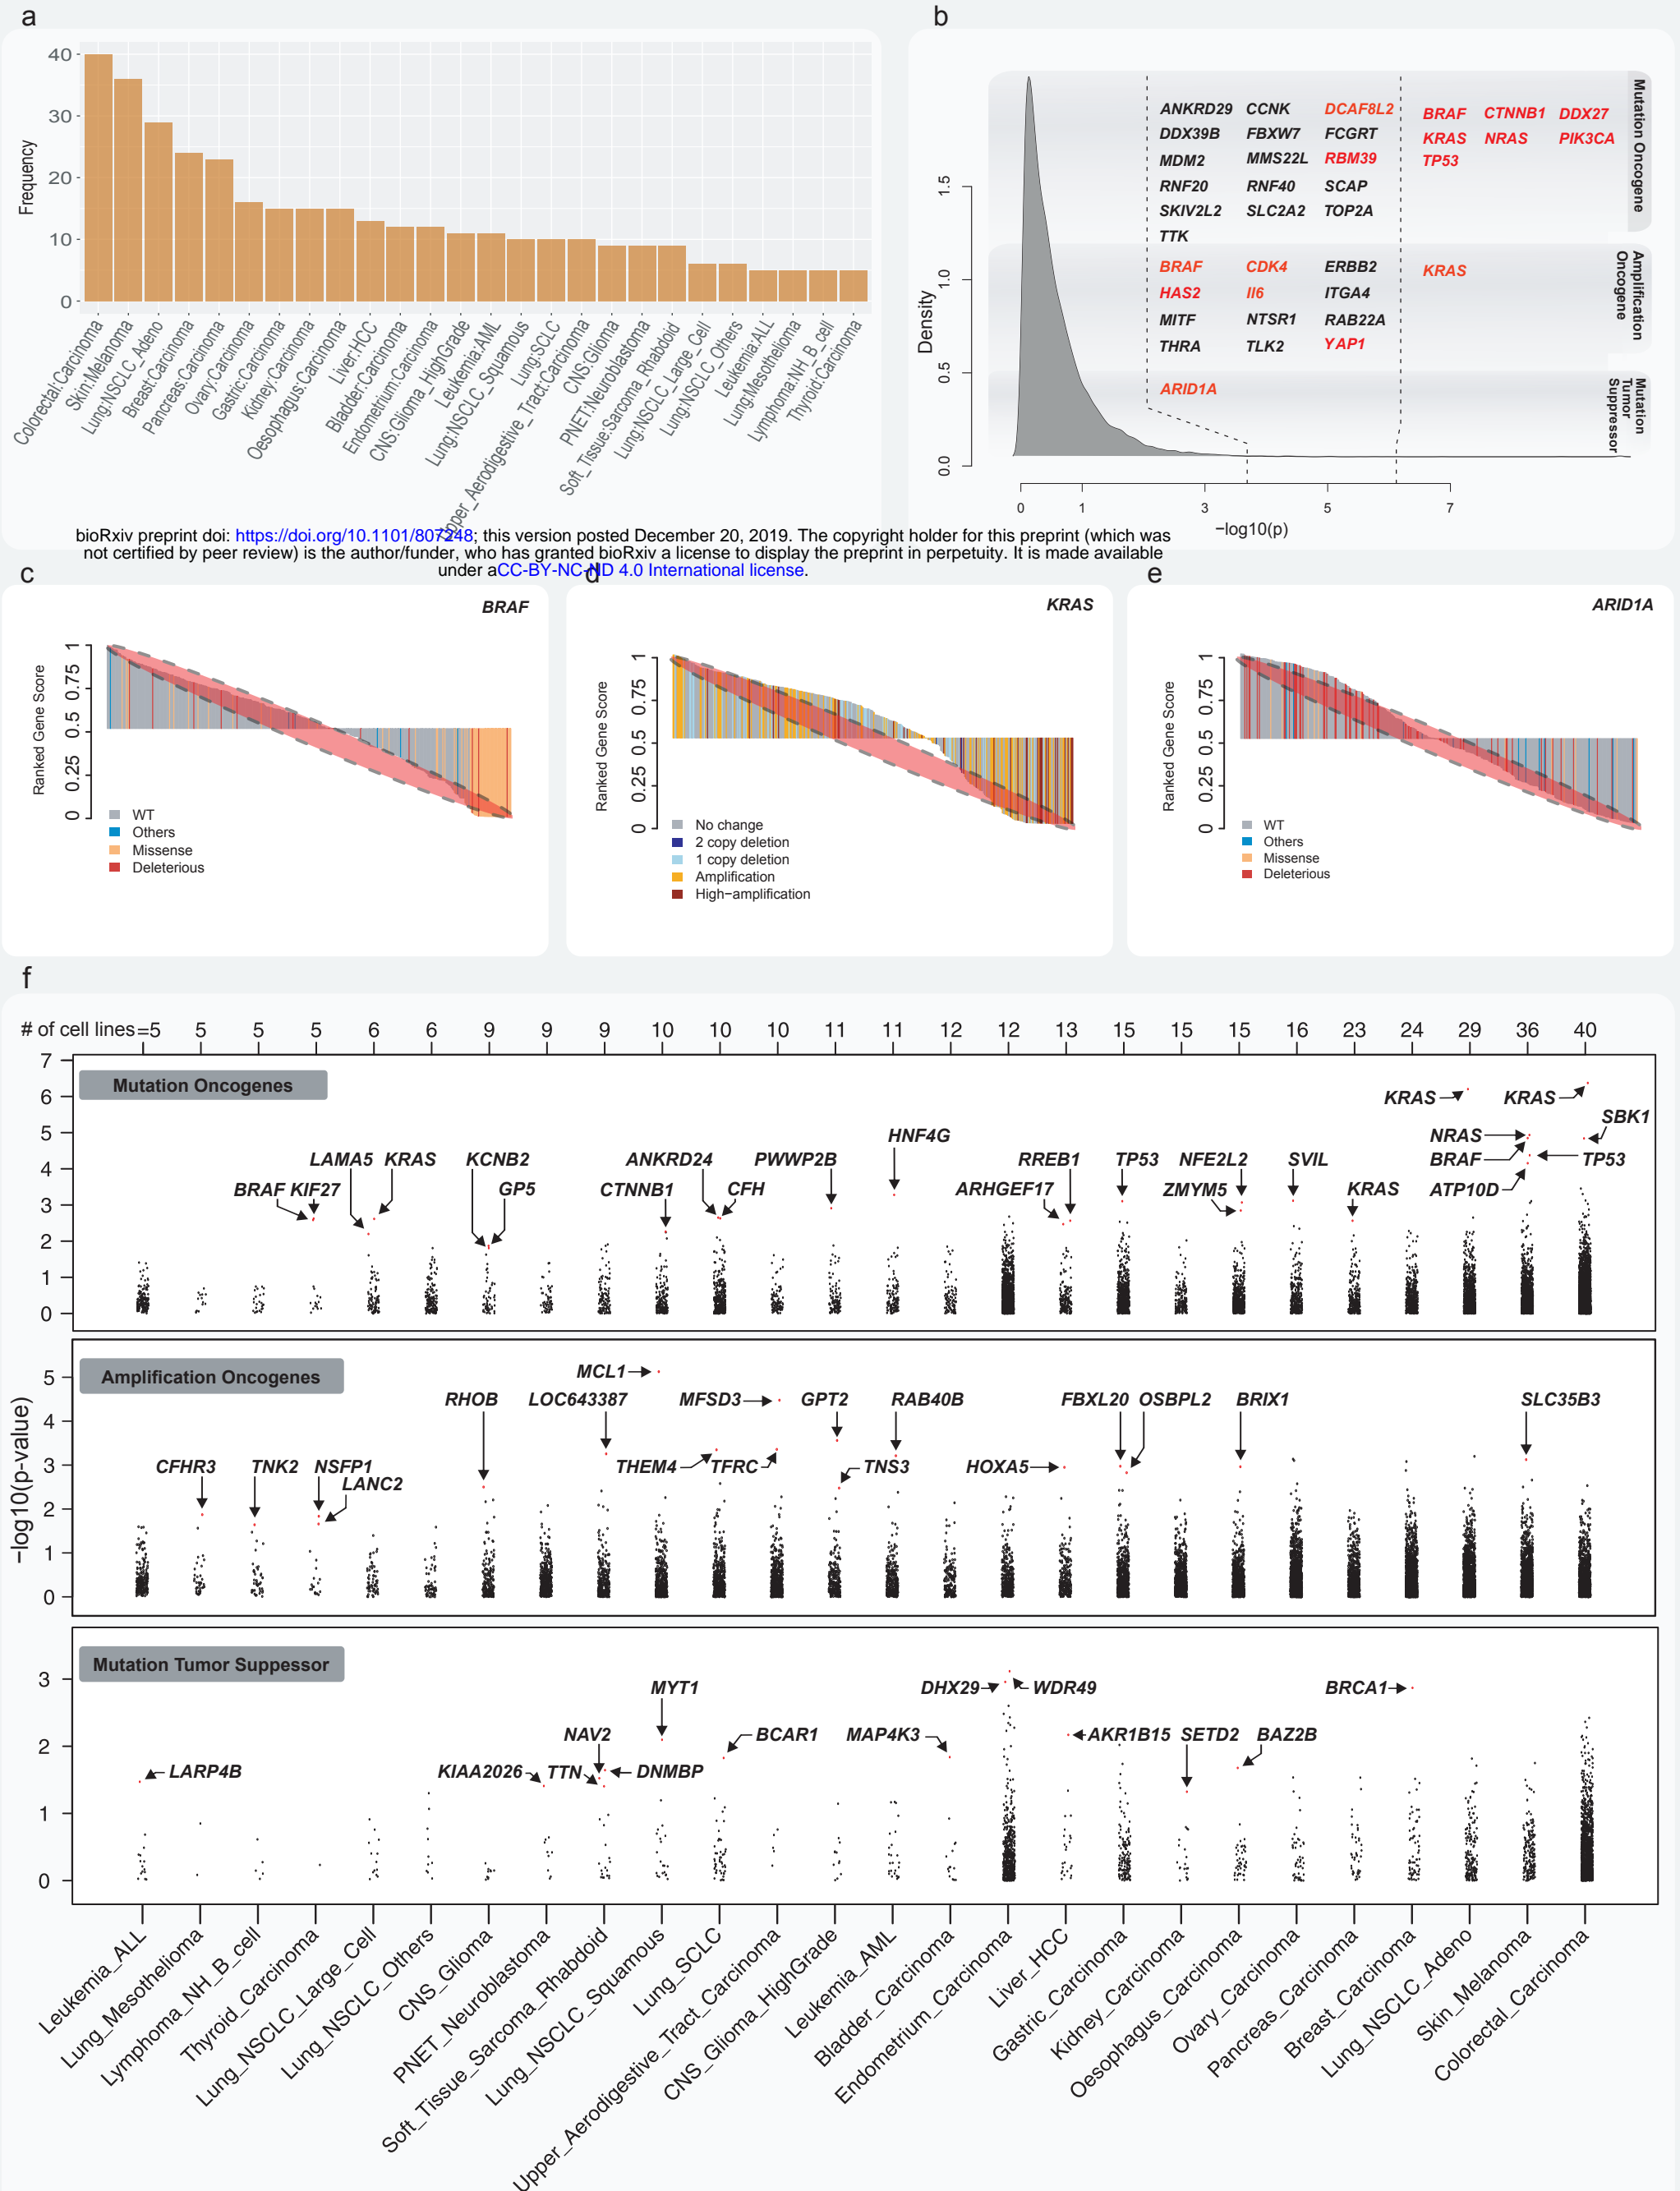

# Fig. 3

bioRxiv preprint doi: <https://doi.org/10.1101/807248>; this version posted December 20, 2019. The copyright holder for this preprint (which was not certified by peer review) is the author/funder, who has granted bioRxiv a license to display the preprint in perpetuity. It is made available under aCC-BY-NC-ND 4.0 International license.

a

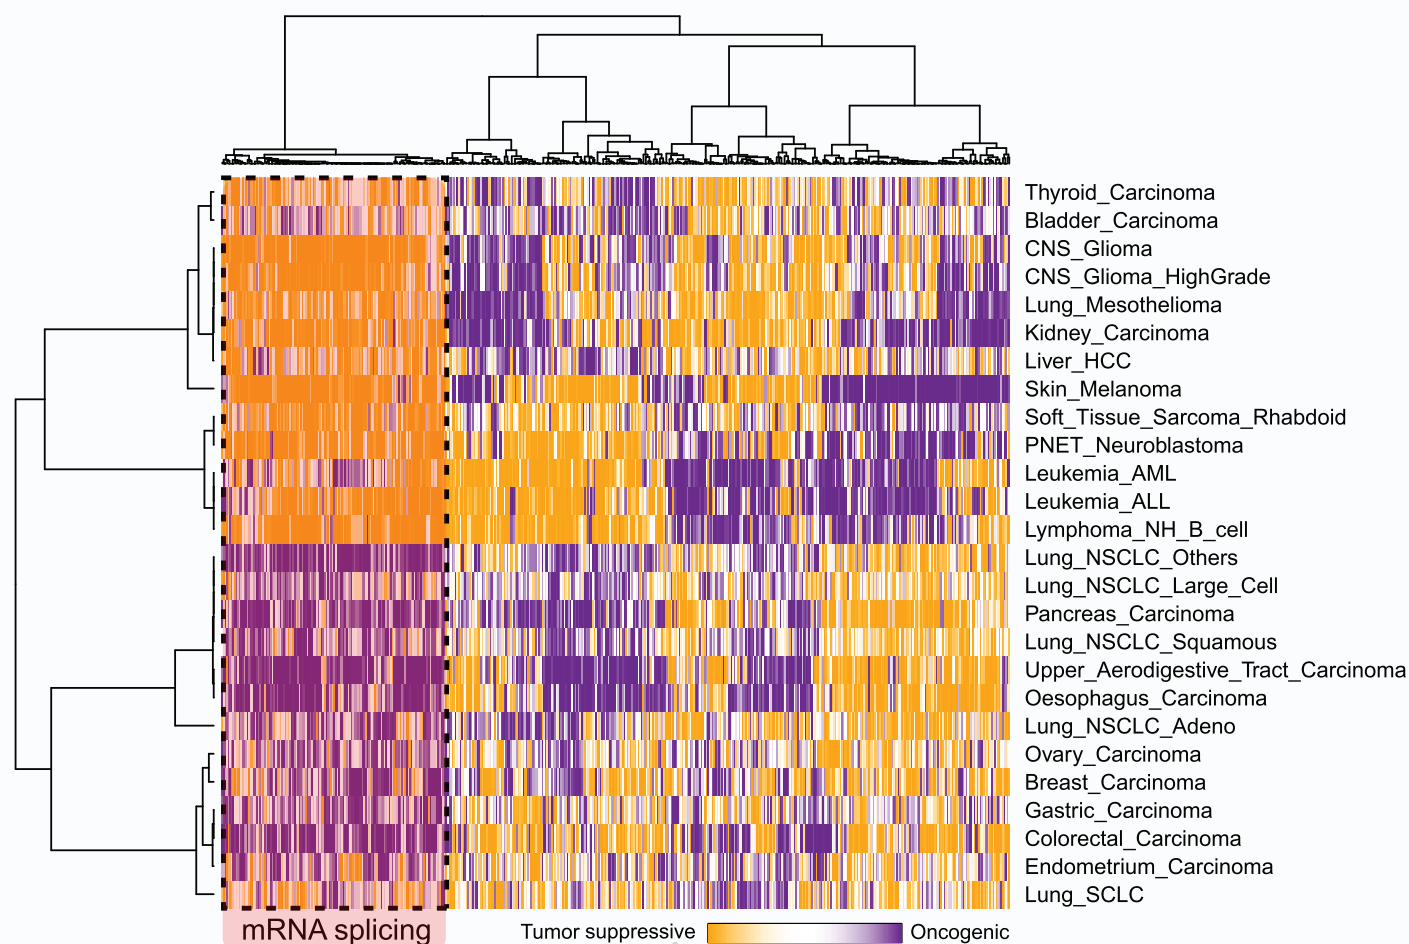

b

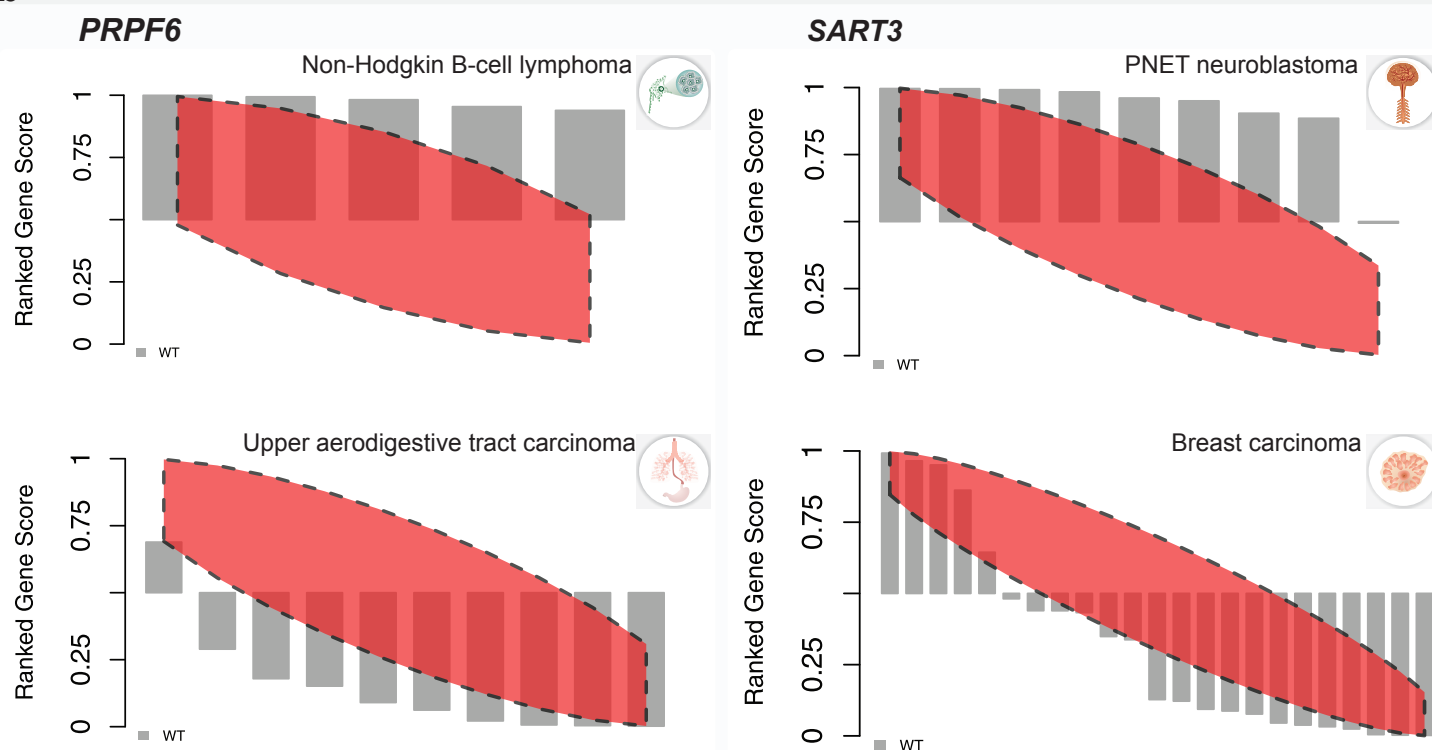

# Fig. 4

bioRxiv preprint doi: <https://doi.org/10.1101/807248>; this version posted December 20, 2019. The copyright holder for this preprint (which was not certified by peer review) is the author/funder, who has granted bioRxiv a license to display the preprint in perpetuity. It is made available under aCC-BY-NC-ND 4.0 International license.

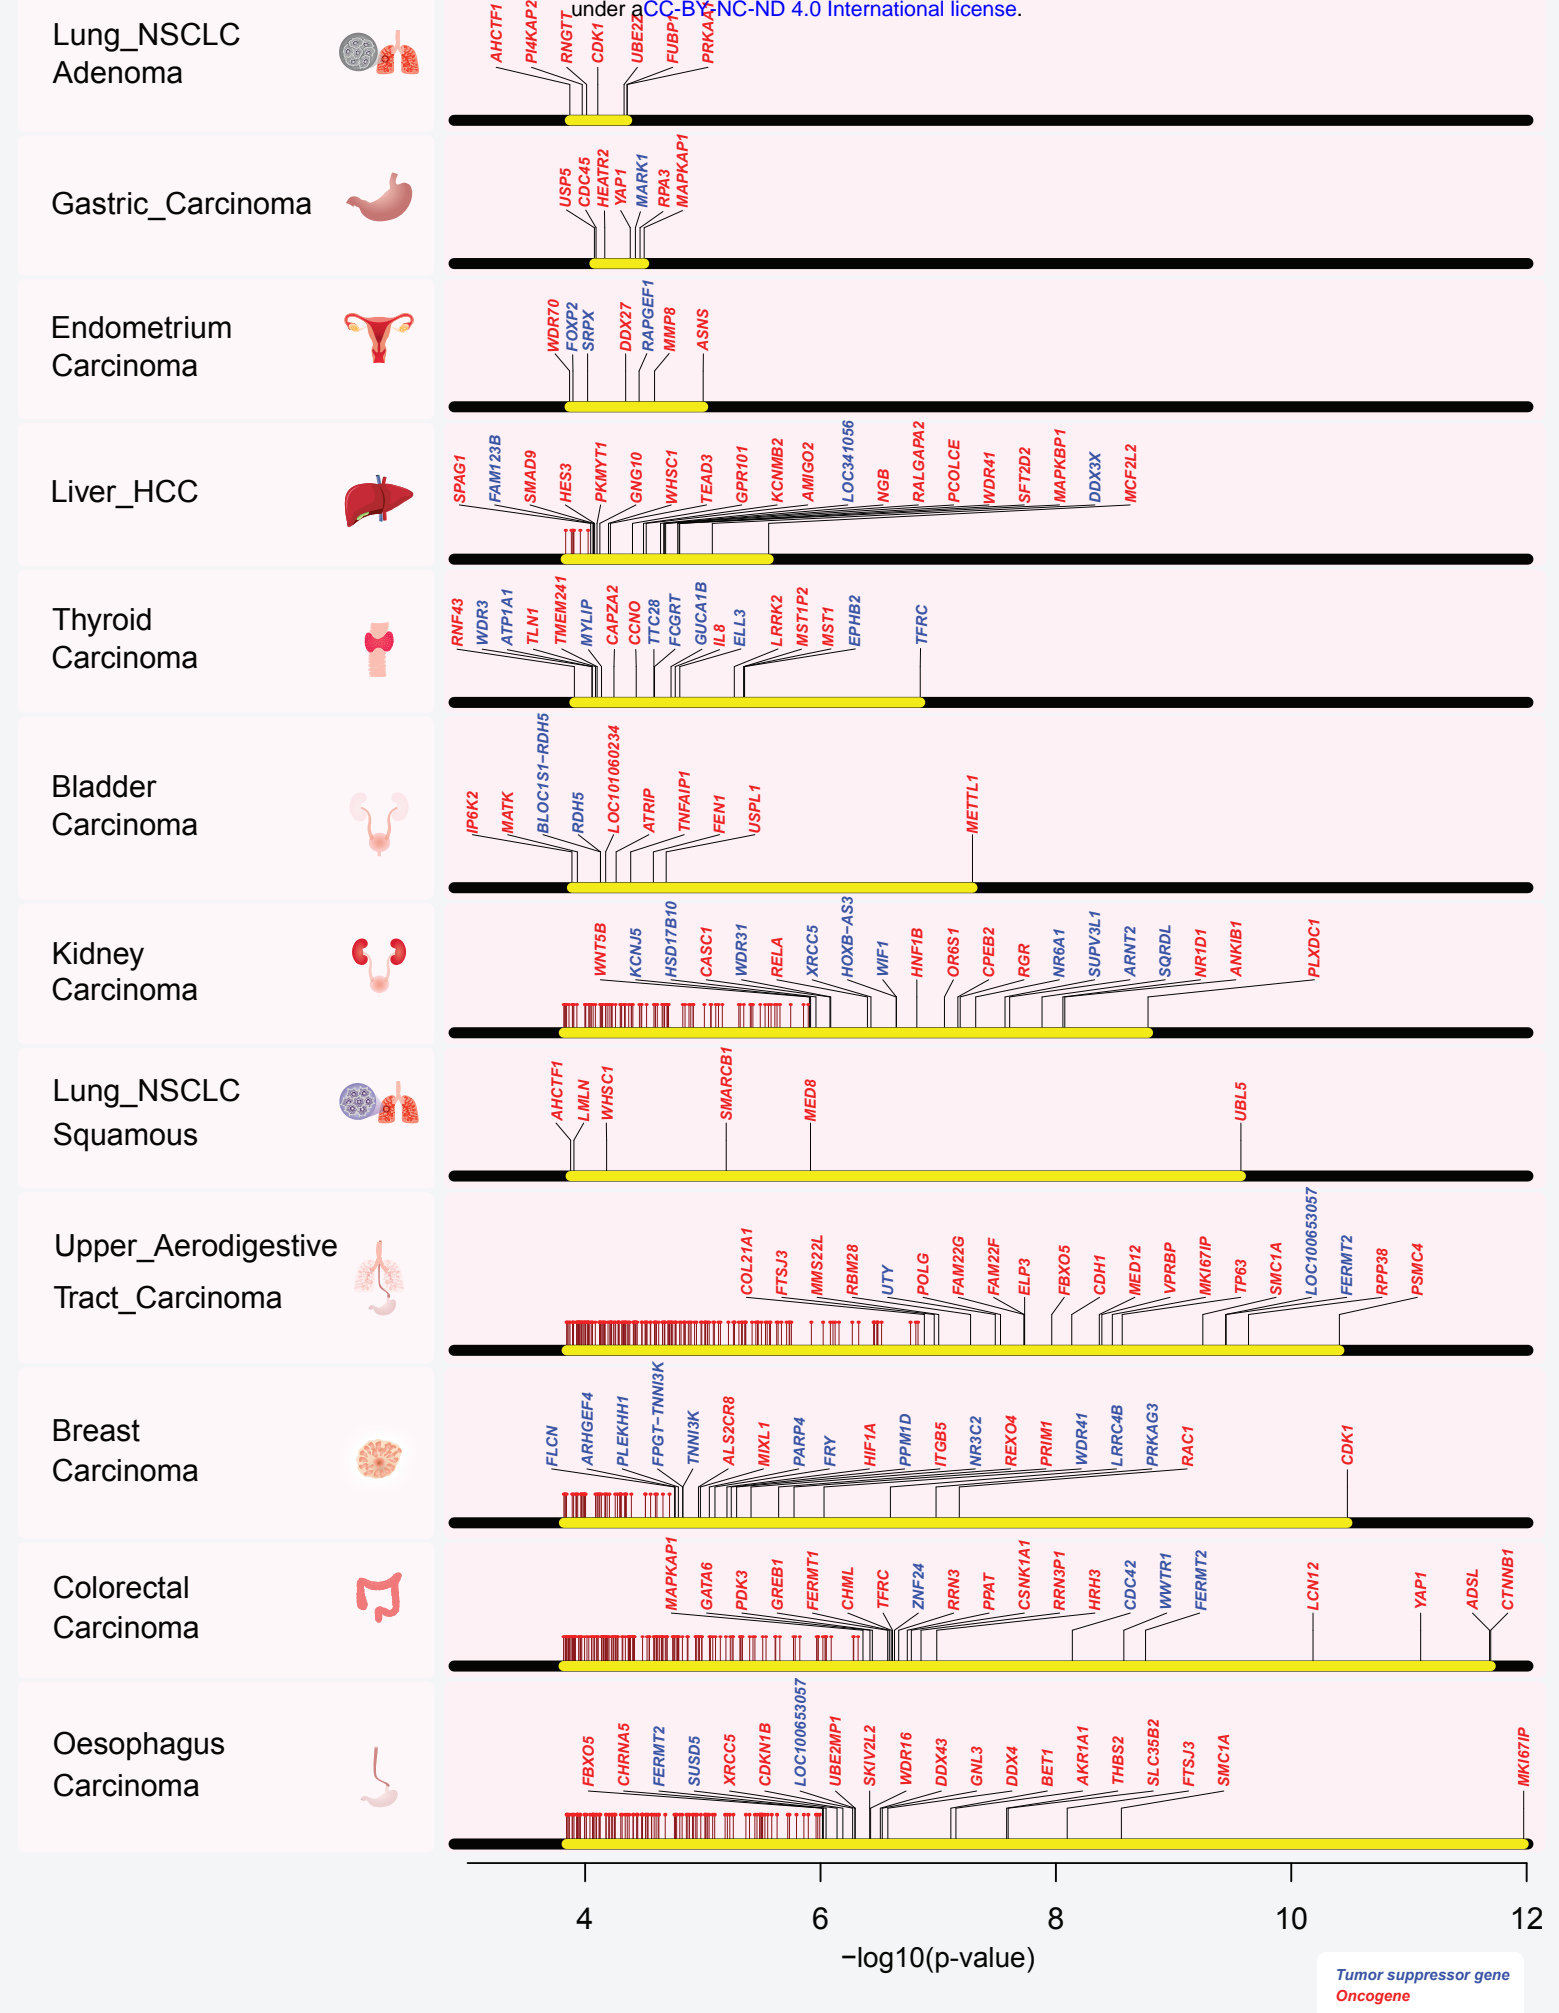

**Fig. 5**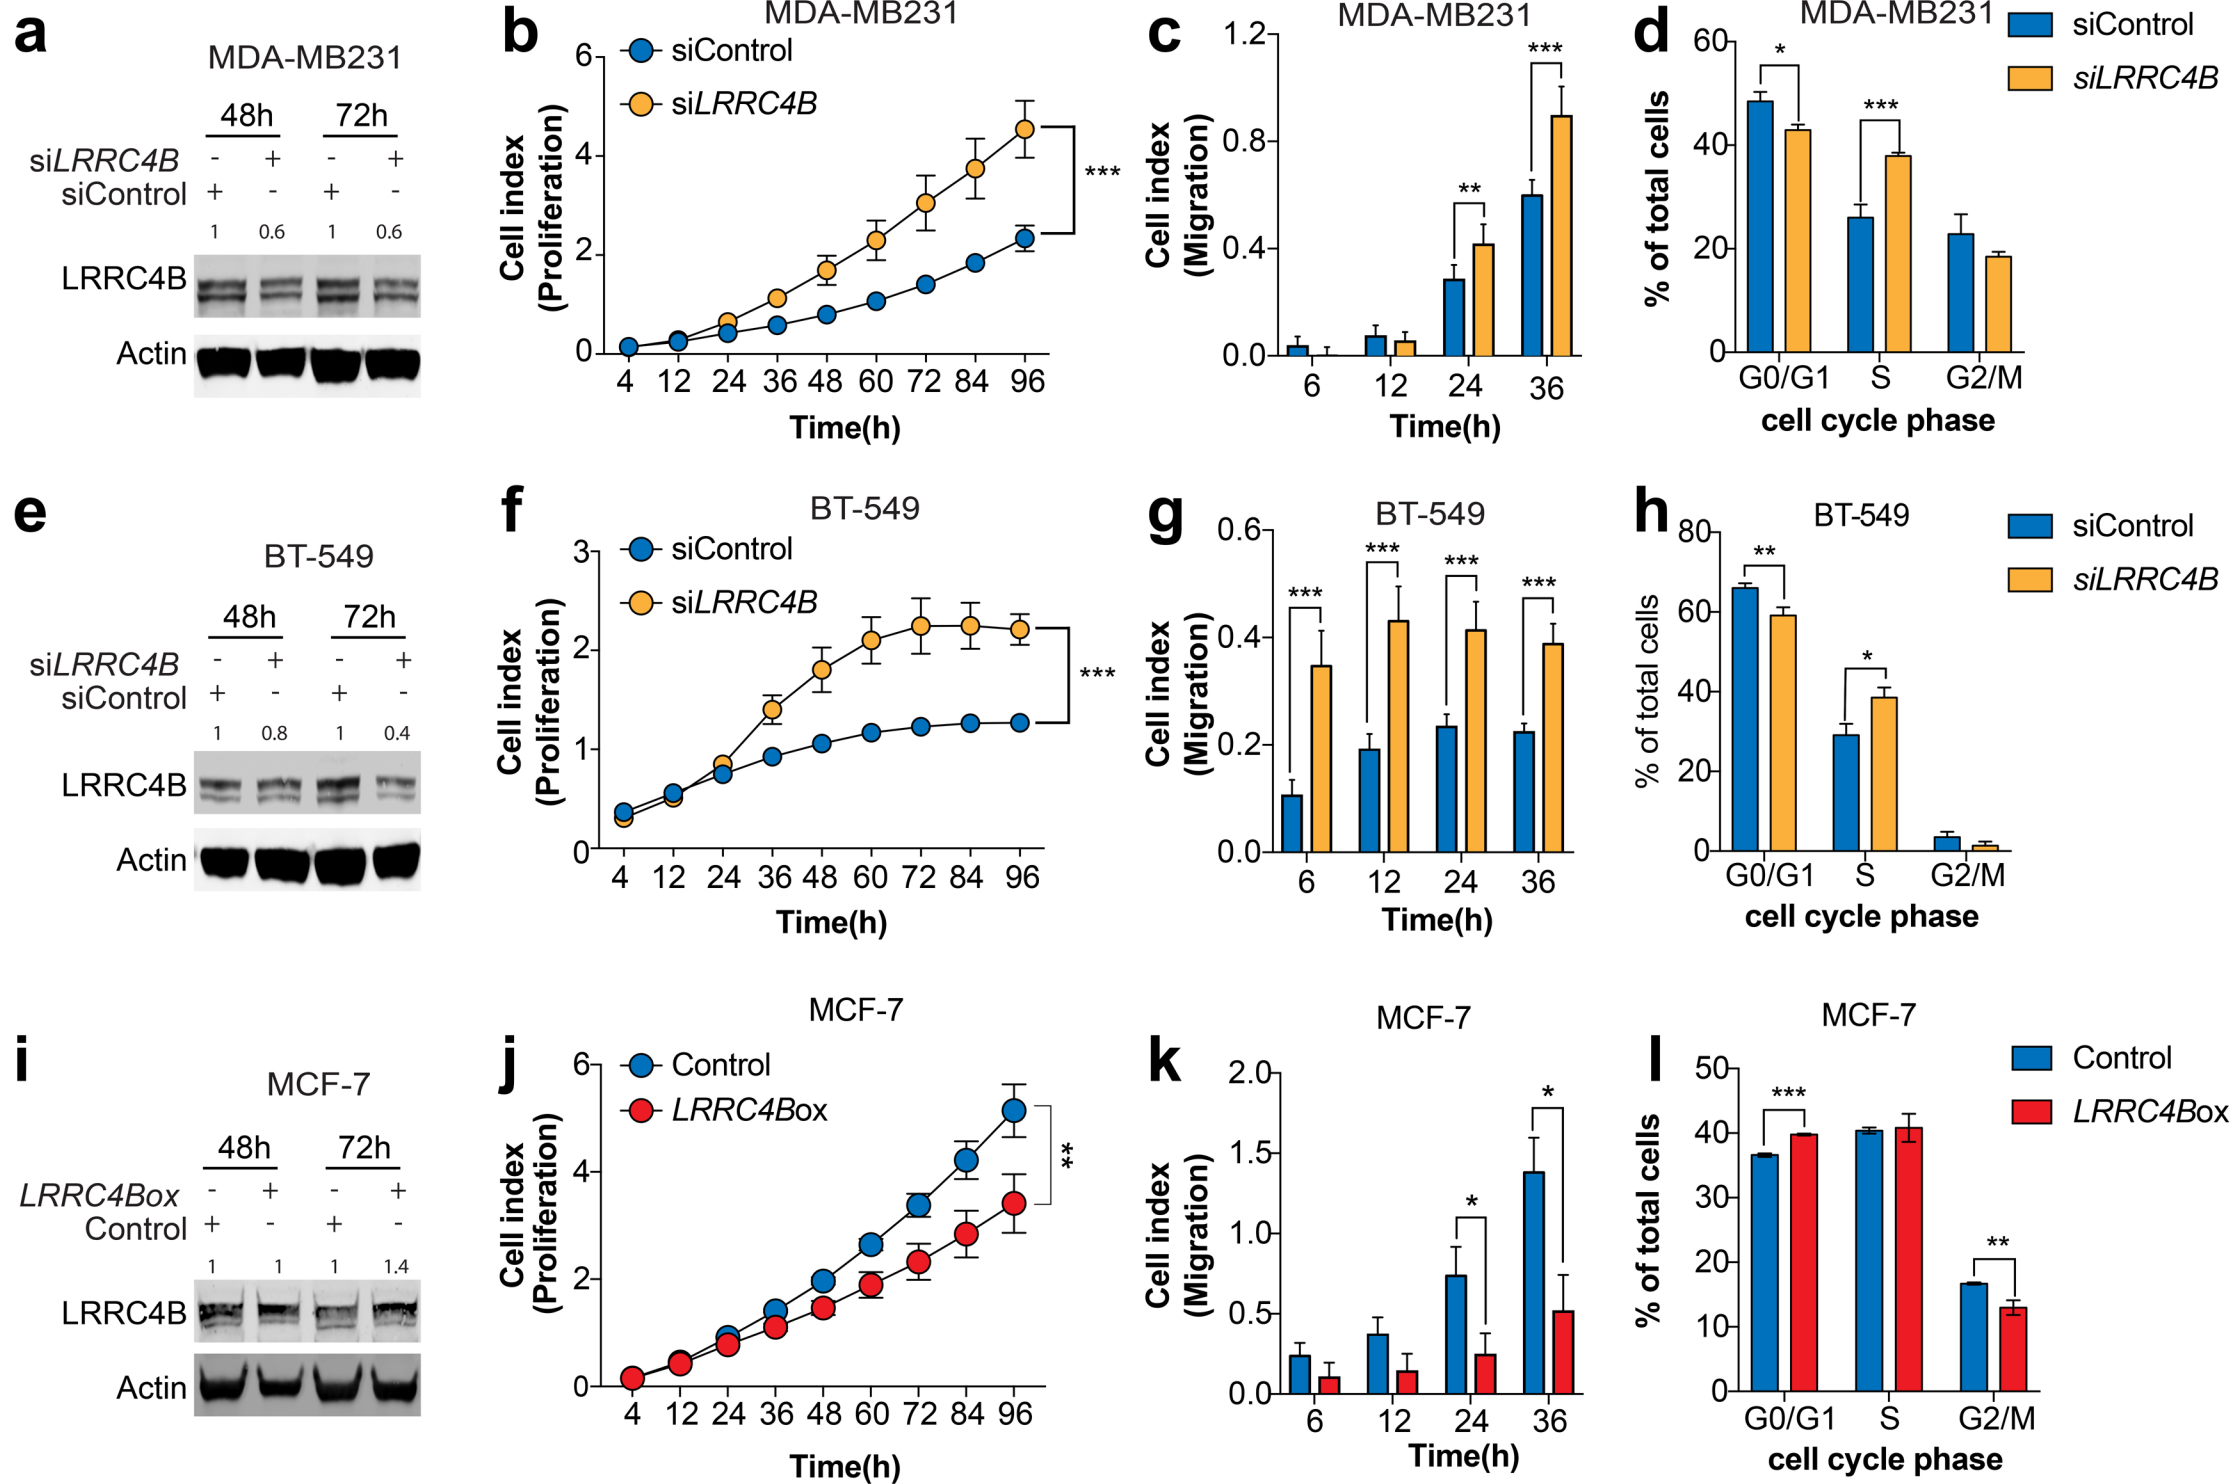

**Fig. 6****a**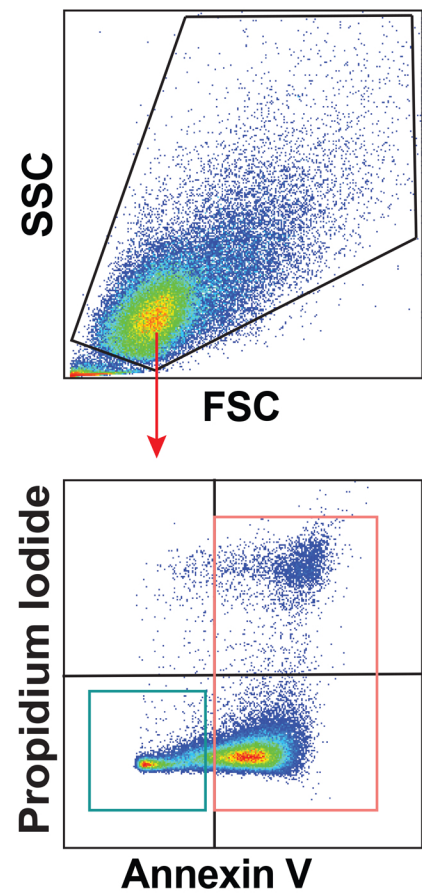**b**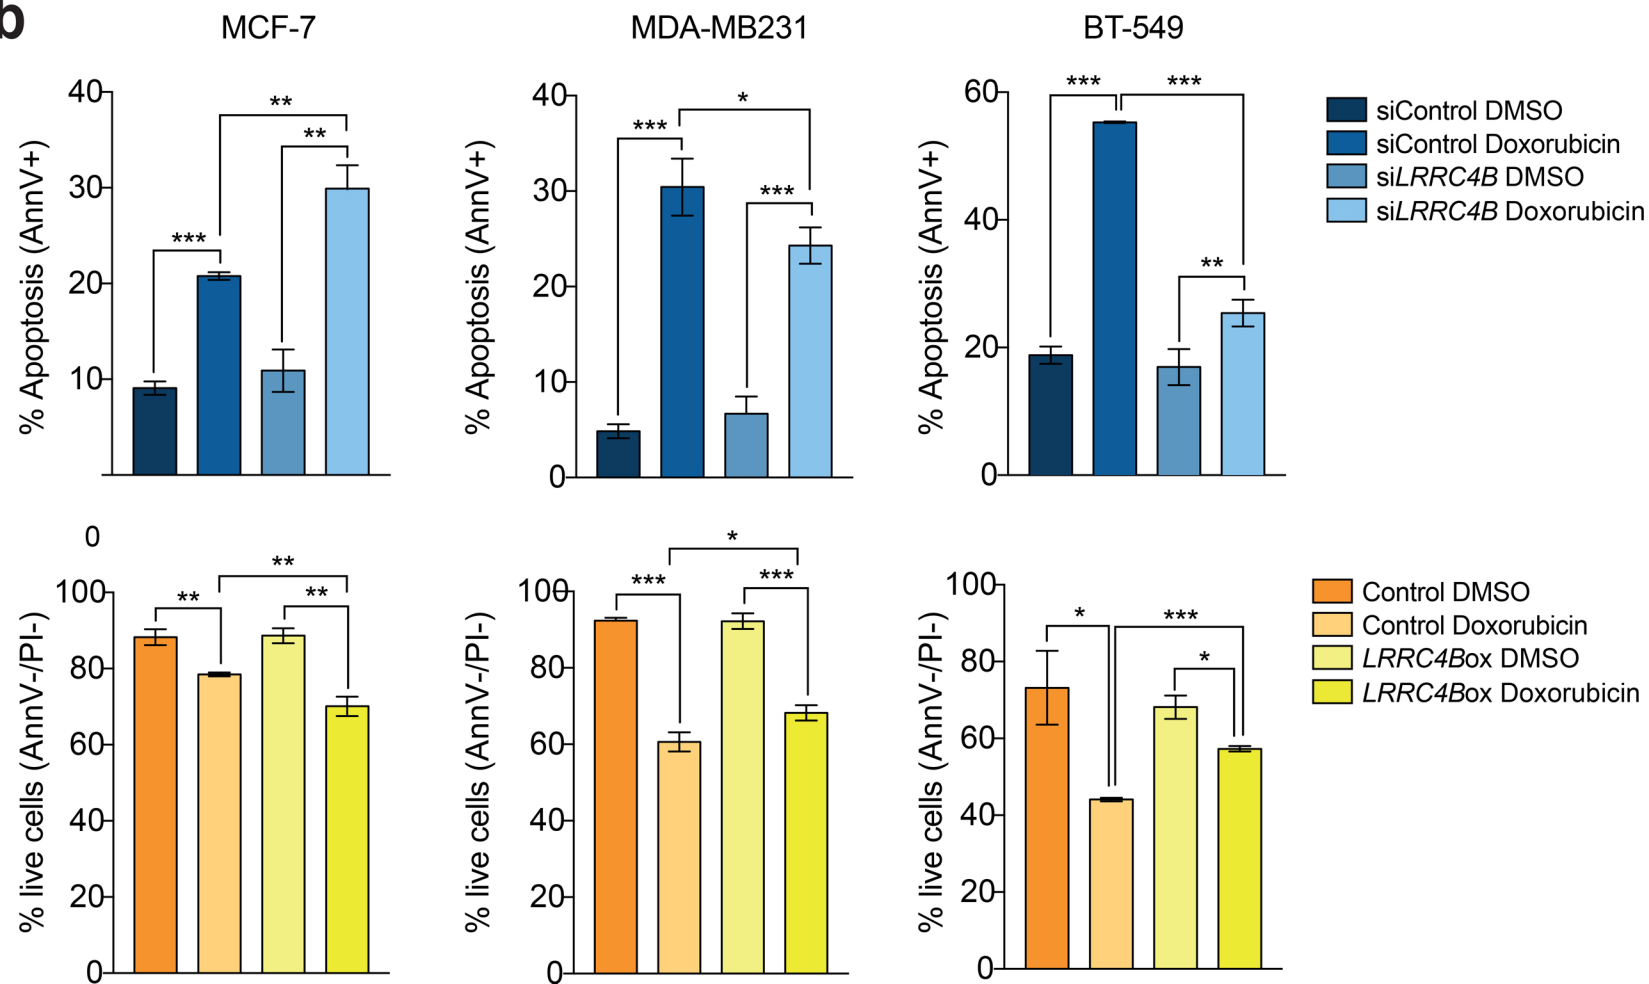

Source: https://www.biorxiv.org/content/biorxiv/early/2019/12/20/807248.full.pdf
